# Supplementary material for: A replicating RNA vaccine confers protection in a rhesus macaque model of Crimean-Congo hemorrhagic fever
Source: PubMed Central journal article supplement (PMC11106275; doi:10.1038/s41541-024-00887-z), 2024-05-20
Supplement: 41541_2024_887_MOESM1_ESM.pdf [file 41541_2024_887_MOESM1_ESM.pdf]

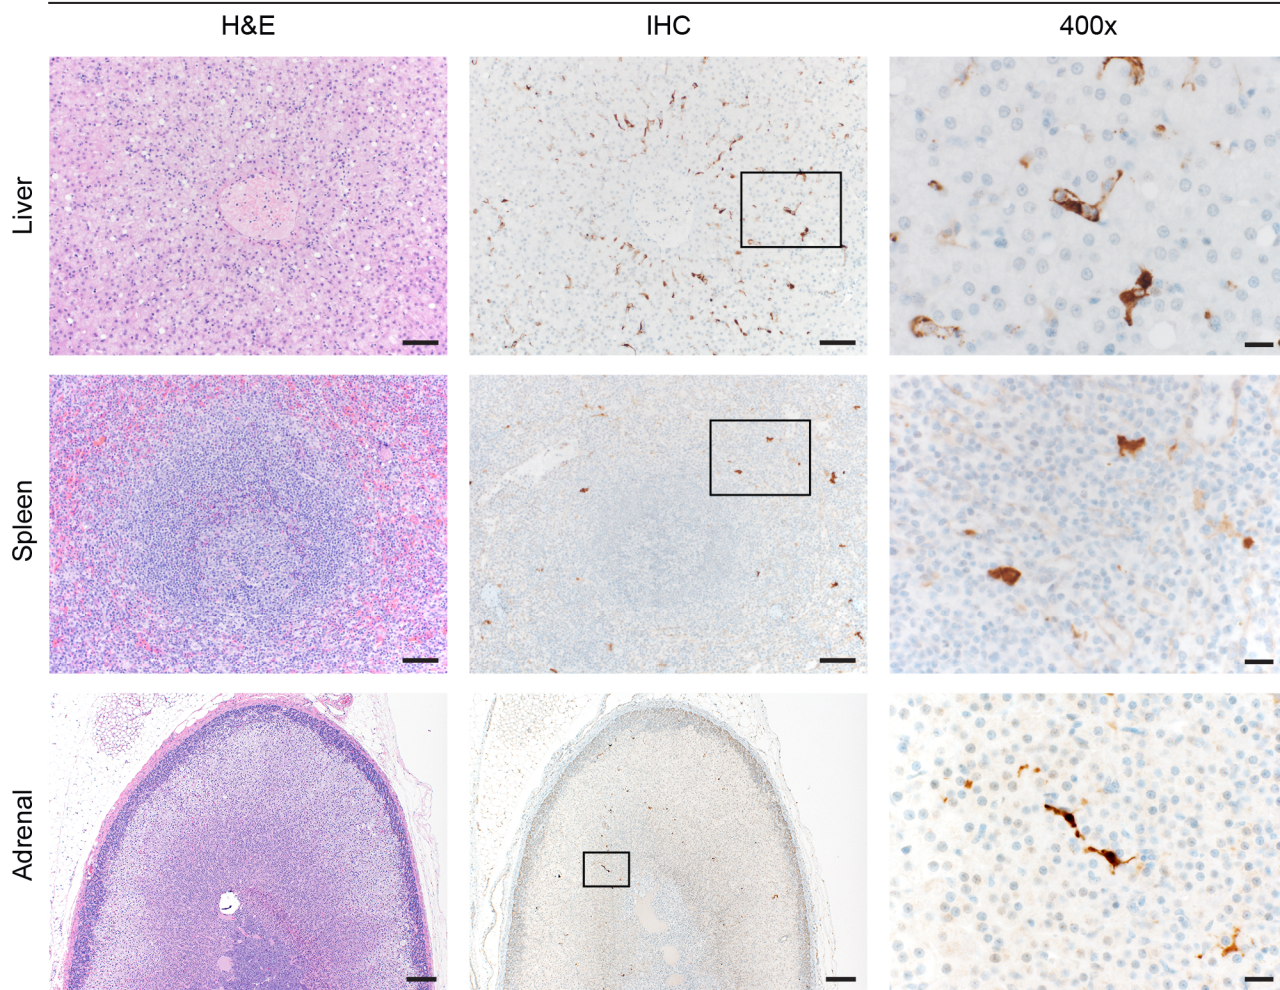

Supplemental Figure 2: H&E and IHC sections of CCHF20. Images are shown at 100x for liver and spleen, 40x for adrenal gland or 400x. Scale bars indicate 200  $\mu\text{m}$  (40x), 100 $\mu\text{m}$  (100x) or 20 $\mu\text{m}$  (400x).

Supplemental Table 1: Complete Blood Chemistry and Hematology for Study 1

| Indian Origin |           |            |            |            |              |           |         |               |             |          |              |           |          |             |          |             |              |           |             |            |            |          |             |          |
|---------------|-----------|------------|------------|------------|--------------|-----------|---------|---------------|-------------|----------|--------------|-----------|----------|-------------|----------|-------------|--------------|-----------|-------------|------------|------------|----------|-------------|----------|
| Study ID      | Sex       | Age (yrs)  |            | BUN        | Creatinine   | ALT       | ALP     | AST           | T.Bilirubin | Glucose  | Calcium      | T.Protein | Albumin  | Globulin    | Na+      | K+          | Cl-          | CCO2      | Hem         | Lip        | Ict        |          |             |          |
| Study Day     | Animal ID | (mg/dL)    | (μmol/L)   | (U/L)      | (mg/dL)      | (U/L)     | (mg/dL) | (mg/dL)       | (mg/dL)     | (mg/dL)  | (mg/dL)      | (g/dL)    | (g/dL)   | (g/dL)      | (mmol/L) | (mmol/L)    | (mmol/L)     | (mmol/L)  | (mmol/L)    | (g/dL)     | (g/dL)     | (g/dL)   |             |          |
| D0            | CCHF01    | 11         | 0.6        | 36         | 687          | 37        | 0.3     | 86            | 10.8        | 6.5      | 4.8          | 1.7       | 152      | 3.9         | 116      | 19          | 0            | 0         | 0           | 0          | 0          |          |             |          |
| D1            | CCHF01    | 11         | 0.8        | 33         | 637          | 42        | 0.3     | 86            | 10.8        | 6.5      | 4.7          | 1.7       | 152      | 4.1         | 112      | 23          | 0            | 0         | 0           | 0          | 0          |          |             |          |
| D3            | CCHF01    | 13         | 0.8        | 34         | 646          | 35        | 0.3     | 75            | 10.4        | 6.7      | 4.8          | 1.9       | 154      | 3.9         | 111      | 24          | 0            | 0         | 0           | 0          | 0          |          |             |          |
| D5            | CCHF01    | 11         | 0.7        | 36         | 624          | 39        | 0.3     | 75            | 10.3        | 6.9      | 4.9          | 2.0       | 156      | 4.1         | 117      | 24          | 0            | 0         | 0           | 0          | 0          |          |             |          |
| D7            | CCHF01    | 11         | 1.0        | 45         | 531          | 60        | 0.3     | 76            | 10.1        | 6.2      | 4.5          | 1.7       | 151      | 3.5         | 114      | 23          | 0            | 0         | 0           | 0          | 0          |          |             |          |
| D9            | CCHF01    | 9          | 0.5        | 35         | 490          | 40        | 0.3     | 75            | 10.4        | 6.4      | 4.6          | 1.8       | 150      | 4.0         | 115      | 24          | 0            | 0         | 0           | 0          | 0          |          |             |          |
| D14           | CCHF01    | 8          | 0.7        | 39         | 586          | 34        | 0.3     | 73            | 10.6        | 6.7      | 4.8          | 1.9       | 153      | 3.8         | 115      | 23          | 0            | 0         | 0           | 0          | 0          |          |             |          |
| D28           | CCHF01    | 11         | 0.7        | 48         | 612          | 42        | 0.2     | 75            | 10.5        | 6.4      | 4.8          | 1.6       | 149      | 4.0         | 124      | 29          | 0            | 0         | 0           | 0          | 0          |          |             |          |
| D0            | CCHF02    | 13         | 1.2        | 15         | 311          | 29        | 0.2     | 78            | 10.6        | 7.2      | 5.4          | 1.8       | 151      | 4.5         | 114      | 19          | 0            | 0         | 0           | 0          | 0          |          |             |          |
| D1            | CCHF02    | 12         | 1.0        | 21         | 297          | 32        | 0.3     | 92            | 10.7        | 7.0      | 5.3          | 1.8       | 152      | 4.3         | 112      | 21          | 0            | 0         | 0           | 0          | 0          |          |             |          |
| D3            | CCHF02    | 14         | 1.0        | 20         | 319          | 34        | 0.3     | 93            | 10.4        | 7.3      | 5.2          | 2.1       | 149      | 4.7         | 108      | 22          | 0            | 0         | 0           | 0          | 0          |          |             |          |
| D5            | CCHF02    | 14         | 0.8        | 27         | 291          | 39        | 0.3     | 82            | 9.6         | 6.9      | 5.1          | 1.9       | 147      | 4.3         | 113      | 26          | 0            | 0         | 0           | 0          | 0          |          |             |          |
| D7            | CCHF02    | 15         | 1.3        | 49         | 256          | 150       | 0.2     | 113           | 9.2         | 6.6      | 4.7          | 1.9       | 146      | 3.7         | 109      | 22          | 0            | 0         | 0           | 0          | 0          |          |             |          |
| D9            | CCHF02    | 11         | 0.9        | 64         | 211          | 74        | 0.2     | 83            | 9.5         | 6.5      | 4.6          | 1.9       | 149      | 4.7         | 114      | 26          | 0            | 0         | 0           | 0          | 0          |          |             |          |
| D14           | CCHF02    | 11         | 0.8        | 23         | 227          | 31        | 0.2     | 83            | 10.2        | 7.0      | 5.0          | 2.0       | 149      | 4.6         | 113      | 27          | 0            | 0         | 0           | 0          | 0          |          |             |          |
| D28           | CCHF02    | 13         | 0.9        | 19         | 272          | 31        | 0.3     | 71            | 11.0        | 7.2      | 5.4          | 1.8       | 149      | 4.4         | 113      | 29          | 0            | 0         | 0           | 0          | 0          |          |             |          |
| D0            | CCHF03    | 13         | 0.8        | 16         | 281          | 24        | 0.2     | 76            | 10.4        | 6.6      | 4.8          | 1.7       | 147      | 4.5         | 114      | 20          | 0            | 0         | 0           | 0          | 0          |          |             |          |
| D1            | CCHF03    | 12         | 1.1        | 14         | 277          | 24        | 0.3     | 94            | 10.4        | 6.3      | 4.7          | 1.7       | 145      | 4.5         | 115      | 22          | 0            | 0         | 0           | 0          | 0          |          |             |          |
| D3            | CCHF03    | 14         | 0.9        | 25         | 299          | 33        | 0.3     | 80            | 9.9         | 6.3      | 4.5          | 1.8       | 143      | 4.7         | 112      | 20          | 0            | 0         | 0           | 0          | 0          |          |             |          |
| D5            | CCHF03    | 11         | 1.0        | 30         | 280          | 34        | 0.3     | 82            | 9.8         | 6.1      | 4.3          | 1.8       | 145      | 4.5         | 116      | 17          | 0            | 0         | 0           | 0          | 0          |          |             |          |
| D7            | CCHF03    | 14         | 0.8        | 45         | 329          | 121       | 0.4     | 87            | 9.7         | 6.6      | 4.4          | 2.2       | 147      | 4.0         | 118      | 16          | 0            | 0         | 0           | 0          | 0          |          |             |          |
| D9            | CCHF03    | 12         | 0.7        | 39         | 293          | 42        | 0.3     | 104           | 10.1        | 6.7      | 4.4          | 2.3       | 146      | 4.3         | 114      | 19          | 0            | 0         | 0           | 0          | 0          |          |             |          |
| D14           | CCHF03    | 14         | 0.6        | 20         | 367          | 29        | 0.2     | 78            | 11.0        | 7.1      | 4.7          | 2.4       | 146      | 5.0         | 109      | 25          | 0            | 0         | 0           | 0          | 0          |          |             |          |
| D28           | CCHF03    | 13         | 1.1        | 14         | 272          | 21        | 0.3     | 69            | 10.4        | 6.3      | 4.5          | 1.8       | 143      | 4.5         | 115      | 22          | 0            | 0         | 0           | 0          | 0          |          |             |          |
| D0            | CCHF04    | 11         | 0.9        | 27         | 170          | 27        | 0.3     | 98            | 11.0        | 7.3      | 4.8          | 2.5       | 148      | 4.7         | 115      | 25          | 0            | 0         | 0           | 0          | 0          |          |             |          |
| D1            | CCHF04    | 9          | 0.8        | 28         | 170          | 32        | 0.3     | 126           | 10.9        | 7.0      | 4.7          | 2.3       | 149      | 4.2         | 112      | 25          | 0            | 0         | 0           | 0          | 0          |          |             |          |
| D3            | CCHF04    | 11         | 0.8        | 34         | 164          | 42        | 0.4     | 85            | 10.1        | 6.5      | 4.3          | 2.2       | 146      | 4.1         | 113      | 25          | 0            | 0         | 0           | 0          | 0          |          |             |          |
| D5            | CCHF04    | 10         | 1.0        | 43         | 181          | 73        | 0.4     | 99            | 9.7         | 6.4      | 4.2          | 2.2       | 144      | 4.6         | 112      | 24          | 0            | 0         | 0           | 0          | 0          |          |             |          |
| D7            | CCHF04    | 10         | 1.0        | 48         | 150          | 75        | 0.4     | 111           | 9.5         | 6.5      | 4.1          | 2.3       | 145      | 4.3         | 113      | 22          | 0            | 0         | 0           | 0          | 0          |          |             |          |
| D9            | CCHF04    | 12         | 0.7        | 36         | 128          | 38        | 0.4     | 120           | 9.8         | 6.5      | 4.2          | 2.3       | 147      | 4.2         | 116      | 25          | 0            | 0         | 0           | 0          | 0          |          |             |          |
| D14           | CCHF04    | 10         | 0.7        | 20         | 161          | 26        | 0.3     | 92            | 10.4        | 7.3      | 4.6          | 2.7       | 148      | 4.0         | 119      | 28          | 0            | 0         | 0           | 0          | 0          |          |             |          |
| D28           | CCHF04    | 10         | 1.0        | 22         | 195          | 24        | 0.3     | 124           | 10.9        | 7.3      | 4.9          | 2.4       | 149      | 4.9         | 118      | 29          | 0            | 0         | 0           | 0          | 0          |          |             |          |
| D0            | CCHF05    | 17         | 1.1        | 67         | 126          | 34        | 0.3     | 55            | 10.4        | 6.7      | 4.9          | 1.8       | 148      | 4.4         | 120      | 25          | 1            | 0         | 0           | 0          | 0          |          |             |          |
| D1            | CCHF05    | 18         | 1.0        | 72         | 110          | 41        | 0.4     | 85            | 10.2        | 6.6      | 4.7          | 1.9       | 147      | 4.3         | 110      | 28          | 0            | 0         | 0           | 0          | 0          |          |             |          |
| D3            | CCHF05    | 14         | 1.3        | 62         | 114          | 54        | 0.5     | 71            | 10.3        | 6.8      | 4.6          | 2.2       | 144      | 4.3         | 114      | 25          | 0            | 0         | 0           | 0          | 0          |          |             |          |
| D5            | CCHF05    | 12         | 1.1        | 63         | 109          | 89        | 0.5     | 92            | 9.5         | 6.5      | 4.4          | 2.0       | 143      | 4.2         | 119      | 26          | 0            | 0         | 0           | 0          | 0          |          |             |          |
| D7            | CCHF05    | 15         | 1.5        | 238        | 128          | 785       | 0.4     | 79            | 9.6         | 6.5      | 4.1          | 2.4       | 145      | 4.0         | 114      | 24          | 0            | 1         | 0           | 0          | 0          |          |             |          |
| D9            | CCHF05    | 16         | 0.9        | 152        | 106          | 240       | 0.3     | 82            | 9.1         | 5.9      | 3.7          | 2.1       | 140      | 4.3         | 108      | 27          | 0            | 0         | 0           | 0          | 0          |          |             |          |
| D14           | CCHF05    | 14         | 0.7        | 70         | 118          | 54        | 0.3     | 71            | 10.2        | 6.6      | 4.2          | 2.4       | 147      | 4.3         | 114      | 29          | 0            | 0         | 0           | 0          | 0          |          |             |          |
| D0            | CCHF06    | 11         | 1.4        | 28         | 101          | 26        | 0.4     | 77            | 9.7         | 6.6      | 4.9          | 1.6       | 151      | 4.3         | 115      | 26          | 0            | 0         | 0           | 0          | 0          |          |             |          |
| D1            | CCHF06    | 12         | 1.5        | 30         | 100          | 33        | 0.4     | 85            | 9.7         | 6.3      | 4.7          | 1.6       | 147      | 4.2         | 113      | 27          | 0            | 0         | 0           | 0          | 0          |          |             |          |
| D3            | CCHF06    | 9          | 1.1        | 36         | 103          | 44        | 0.4     | 74            | 9.5         | 6.3      | 4.5          | 1.7       | 150      | 4.3         | 116      | 27          | 1            | 0         | 0           | 0          | 0          |          |             |          |
| D5            | CCHF06    | 9          | 1.1        | 44         | 87           | 50        | 0.4     | 76            | 9.5         | 6.4      | 4.6          | 1.8       | 148      | 4.2         | 116      | 30          | 0            | 0         | 0           | 0          | 0          |          |             |          |
| D7            | CCHF06    | 11         | 0.9        | 59         | 95           | 80        | 0.3     | 78            | 9.4         | 6.4      | 4.5          | 1.9       | 148      | 4.1         | 116      | 26          | 0            | 0         | 0           | 0          | 0          |          |             |          |
| D9            | CCHF06    | 9          | 1.3        | 43         | 95           | 36        | 0.4     | 77            | 9.5         | 6.7      | 4.6          | 2.1       | 146      | 4.2         | 115      | 28          | 0            | 0         | 0           | 0          | 0          |          |             |          |
| D14           | CCHF06    | 11         | 0.9        | 31         | 102          | 27        | 0.4     | 76            | 9.9         | 6.7      | 4.8          | 2.0       | 148      | 4.1         | 118      | 27          | 0            | 0         | 0           | 0          | 0          |          |             |          |
| D28           | CCHF06    | 11         | 1.1        | 28         | 104          | 27        | 0.4     | 75            | 9.8         | 6.9      | 4.9          | 1.9       | 147      | 4.4         | 118      | 29          | 0            | 0         | 0           | 0          | 0          |          |             |          |
| D0            | CCHF07    | 11         | 1.2        | 37         | 125          | 24        | 0.3     | 82            | 11.0        | 7.5      | 5.0          | 2.4       | 149      | 4.7         | 113      | 28          | 0            | 0         | 0           | 0          | 0          |          |             |          |
| D1            | CCHF07    | 11         | 1.2        | 29         | 104          | 38        | 0.4     | 83            | 10.4        | 7.0      | 4.7          | 2.4       | 147      | 4.3         | 107      | 28          | 0            | 0         | 0           | 0          | 0          |          |             |          |
| D3            | CCHF07    | 17         | 1.0        | 85         | 127          | 154       | 0.5     | 72            | 9.7         | 6.6      | 4.3          | 2.3       | 145      | 3.9         | 113      | 24          | 0            | 0         | 0           | 0          | 0          |          |             |          |
| D5            | CCHF07    | 14         | 1.3        | 454        | 159          | 497       | 0.4     | 84            | 9.4         | 6.1      | 4.1          | 2.0       | 145      | 4.1         | 113      | 27          | 0            | 0         | 0           | 0          | 0          |          |             |          |
| D7            | CCHF07    | 13         | 0.7        | 742        | 200          | 401       | 0.7     | 79            | 9.5         | 6.1      | 3.9          | 2.2       | 148      | 3.9         | 112      | 28          | 0            | 0         | 0           | 0          | 0          |          |             |          |
| D9            | CCHF07    | 11         | 1.2        | 288        | 171          | 68        | 0.4     | 80            | 9.7         | 6.7      | 4.0          | 2.7       | 149      | 4.2         | 115      | 30          | 0            | 0         | 0           | 0          | 0          |          |             |          |
| D14           | CCHF07    | 8          | 0.5        | 69         | 165          | 30        | 0.4     | 75            | 10.7        | 7.1      | 4.5          | 2.6       | 151      | 4.6         | 112      | 29          | 0            | 0         | 0           | 0          | 0          |          |             |          |
| D0            | CCHF08    | 10         | 1.0        | 87         | 128          | 33        | 0.3     | 78            | 10.1        | 6.8      | 4.6          | 2.2       | 148      | 4.0         | 115      | 26          | 0            | 0         | 0           | 0          | 0          |          |             |          |
| D1            | CCHF08    | 9          | 0.6        | 94         | 159          | 48        | 0.3     | 87            | 10.0        | 6.3      | 4.3          | 2.0       | 145      | 3.9         | 109      | 27          | 0            | 0         | 0           | 0          | 0          |          |             |          |
| D3            | CCHF08    | 10         | 0.5        | 83         | 148          | 49        | 0.3     | 68            | 10.1        | 6.7      | 4.4          | 2.3       | 150      | 4.2         | 115      | 27          | 0            | 0         | 0           | 0          | 0          |          |             |          |
| D5            | CCHF08    | 7          | 0.6        | 121        | 186          | 57        | 0.3     | 75            | 9.3         | 6.3      | 4.3          | 2.0       | 143      | 3.5         | 115      | 27          | 0            | 0         | 0           | 0          | 0          |          |             |          |
| D7            | CCHF08    | 10         | 0.3        | 112        | 87           | 64        | 0.3     | 73            | 9.6         | 6.2      | 4.1          | 2.1       | 141      | 3.2         | 110      | 27          | 0            | 0         | 0           | 0          | 0          |          |             |          |
| D9            | CCHF08    | 7          | 0.6        | 110        | 150          | 58        | 0.3     | 77            | 9.3         | 6.4      | 4.2          | 2.2       | 145      | 3.8         | 112      | 30          | 0            | 0         | 0           | 0          | 0          |          |             |          |
| D14           | CCHF08    | 10         | 0.8        | 76         | 146          | 35        | 0.3     | 79            | 9.6         | 6.6      | 4.3          | 2.3       | 147      | 3.9         | 115      | 28          | 0            | 0         | 0           | 0          | 0          |          |             |          |
| D28           | CCHF08    | 10         | 0.6        | 112        | 114          | 47        | 0.3     | 62            | 9.9         | 6.4      | 4.3          | 2.0       | 146      | 3.8         | 119      | 28          | 0            | 0         | 0           | 0          | 0          |          |             |          |
| Study Day     | Animal ID | RBC (M/uL) | WBC (K/uL) | HGB (g/dL) | NEUT# (K/uL) | NEUT% (%) | HCT (%) | LYMPH# (K/uL) | LYMPH% (%)  | MCV (fL) | MONO# (K/uL) | MONO% (%) | MCH (pg) | EOS# (K/uL) | EOS% (%) | MCHC (g/dL) | BASO# (K/uL) | BASO% (%) | RDW SD (fL) | RDW CV (%) | PLT (K/uL) | MPV (fL) | RET# (K/uL) | RET% (%) |
| D0            | CCHF01    | 6.25       | 6.58       | 13         | 2.97         | 45.2      | 38.2    | 2.85          | 43.3        | 61.1     | 0.64         | 9.7       | 20.8     | 0.12        | 1.8      | 34          | 0            | 0         | 33.1        | 16.2       | 336        | 9.8      | 51.3        | 0.82     |
| D1            | CCHF01    | 5.62       | 6.81       | 11.7       | 2.2          | 32.4      | 35.9    | 3.95          | 58          | 63.9     | 0.52         | 7.6       | 20.8     | 0.13        | 1.9      | 32.6        | 0.01         | 0.1       | 35.1        | 16.2       | 341        | 9.9      | 62.9        | 1.12     |
| D3            | CCHF01    | 5.8        | 5.73       | 12.2       | 1.03         | 18        | 37.2    | 3.99          | 69.6        | 64.1     | 0.71         | 12.4      | 21       | 0           | 0        | 34.8        | 0            | 0         | 34.8        | 15.9       | 370        | 9.4      | 61.5        | 1.06     |
| D5            | CCHF01    | 5.49       | 4.4        | 11.4       | 0.94         | 21.4      | 35.3    | 2.83          | 64.3        | 64.3     | 0.58         | 13.2      | 20.8     | 0.05        | 1.1      | 32.3        | 0            | 0         | 35          | 16         | 341        | 9.6      | 66.4        | 1.21     |
| D7            | CCHF01    | 5.41       | 6.25       | 11.3       | 0.93         | 14.9      | 34.8    | 4.61          | 73.8        | 64.3     | 0.69         | 11        | 20.9     | 0.02        | 0.3      | 32.5        | 0            | 0         | 35.1        | 16         | 347        | 9.7      | 54.6        | 1.01     |
| D9            | CCHF01    | 5.28       | 9.97       | 11         | 0.95         | 9.5       | 34.2    | 7.31          | 73.3        | 64.8     | 1.71         | 17.2      | 20.8     | 0           | 0        | 32.2        | 0            | 0         | 34.5        | 15.6       | 406        | 9.7      | 69.2        | 1.31     |
| D14           | CCHF01    | 5.86       | 9.88       | 12.4       | 1.59         | 16.1      | 37.8    | 6.27          | 63.5        | 64.5     | 1.9          | 19.2      | 21.2     | 0.12        |          |             |              |           |             |            |            |          |             |          |

|            |        |      |       |      |       |      |      |      |      |      |      |      |      |      |     |      |      |     |      |      |     |      |       |      |
|------------|--------|------|-------|------|-------|------|------|------|------|------|------|------|------|------|-----|------|------|-----|------|------|-----|------|-------|------|
| D0         | CCHF06 | 6.42 | 4.81  | 16   | 3.35  | 69.6 | 49.1 | 1.09 | 22.7 | 76.5 | 0.36 | 7.5  | 24.9 | 0    | 0   | 32.6 | 0.01 | 0.2 | 39.9 | 14.9 | 342 | 9.7  | 85.4  | 1.33 |
| D1         | CCHF06 | 5.78 | 10.07 | 14.4 | 8.56  | 85   | 44.8 | 1.06 | 10.5 | 77.5 | 0.42 | 4.2  | 24.9 | 0.01 | 0.1 | 32.1 | 0.02 | 0.2 | 40.7 | 14.9 | 333 | 9.7  | 63    | 1.09 |
| D3         | CCHF06 | 5.77 | 3.69  | 14.5 | 1.88  | 51   | 44.5 | 1.34 | 36.3 | 77.1 | 0.47 | 12.7 | 25.1 | 0    | 0   | 32.6 | 0    | 0   | 40.5 | 14.9 | 317 | 9.9  | 41.5  | 0.72 |
| D5         | CCHF06 | 6.09 | 2.56  | 15.2 | 0.96  | 37.5 | 46.9 | 1.18 | 46.1 | 77   | 0.42 | 16.4 | 25   | 0    | 0   | 32.4 | 0    | 0   | 40   | 14.8 | 323 | 9.9  | 16.4  | 0.27 |
| D7         | CCHF06 | 5.93 | 3.25  | 14.7 | 0.49  | 15.1 | 46   | 2.31 | 71.1 | 77.6 | 0.45 | 13.8 | 24.8 | 0    | 0   | 32   | 0    | 0   | 40.7 | 14.9 | 295 | 9.6  | 45.1  | 0.76 |
| D9         | CCHF06 | 6.06 | 7.48  | 15.2 | 1.52  | 20.3 | 47   | 5.02 | 67.1 | 77.6 | 0.94 | 12.6 | 25.1 | 0    | 0   | 32.3 | 0    | 0   | 40.8 | 14.9 | 269 | 10.4 | 66.1  | 1.09 |
| D14        | CCHF06 | 6.29 | 8.39  | 15.7 | 3.53  | 42.1 | 47.5 | 3.66 | 43.6 | 75.5 | 1.2  | 14.3 | 25   | 0    | 0   | 33.1 | 0    | 0   | 38.4 | 14.8 | 331 | 9.9  | 67.3  | 1.07 |
| D28        | CCHF06 | 6.39 | 4.8   | 16   | 2.65  | 55.2 | 48.2 | 1.59 | 33.1 | 75.4 | 0.55 | 11.5 | 25   | 0.01 | 0.2 | 33.2 | 0    | 0   | 38   | 15   | 304 | 10.1 | 77.3  | 1.21 |
| D0         | CCHF07 | 6.36 | 9.16  | 14.6 | 7.73  | 84.3 | 44.8 | 1.04 | 11.4 | 70.4 | 0.39 | 4.3  | 23   | 0    | 0   | 32.6 | 0    | 0   | 38.3 | 16.3 | 432 | 9.4  | 76.3  | 1.2  |
| D1         | CCHF07 | 5.75 | 16.42 | 13.2 | 14.67 | 89.3 | 41   | 1.05 | 6.4  | 71.3 | 0.67 | 4.1  | 23   | 0    | 0   | 32.2 | 0.03 | 0.2 | 39.1 | 16.4 | 370 | 9.8  | 59.2  | 1.03 |
| D3         | CCHF07 | 5.66 | 6.76  | 13   | 4.8   | 71   | 39.7 | 1.49 | 22   | 70.1 | 0.47 | 7    | 23   | 0    | 0   | 32.7 | 0    | 0   | 39.2 | 16.2 | 252 | 10.1 | 15.8  | 0.28 |
| D3 (rerun) | CCHF07 | 5.63 | 6.85  | 13.1 | 4.82  | 70.3 | 39.3 | 1.47 | 21.5 | 69.8 | 0.56 | 8.2  | 23.3 | 0    | 0   | 33.3 | 0    | 0   | 39.1 | 16.2 | 258 | 10.4 | 15.8  | 0.28 |
| D5         | CCHF07 | 5.7  | 2.45  | 13.3 | 1.07  | 43.7 | 40.1 | 1    | 40.8 | 70.4 | 0.38 | 15.5 | 23.3 | 0    | 0   | 33.2 | 0    | 0   | 38.2 | 15.5 | 201 | 10.9 | 12.5  | 0.22 |
| D7         | CCHF07 | 5.75 | 6.85  | 13.3 | 1.24  | 18.1 | 40.6 | 3.8  | 55.5 | 70.6 | 1.8  | 26.3 | 23.1 | 0    | 0   | 32.8 | 0.01 | 0.1 | 38.2 | 15.6 | 79  | 16.1 | 11.5  | 0.2  |
| D7 (rerun) | CCHF07 | 5.78 | 6.99  | 13.2 | 1.26  | 18.1 | 40.8 | 3.73 | 53.4 | 70.6 | 1.98 | 28.3 | 22.8 | 0.01 | 0.1 | 32.4 | 0.01 | 0.1 | 37.8 | 15.5 | 71  | 16.2 | 8.7   | 0.15 |
| D7 (rerun) | CCHF07 | 5.72 | 6.93  | 13.2 | 1.23  | 17.8 | 40.3 | 3.76 | 54.3 | 70.5 | 1.93 | 27.8 | 23.1 | 0    | 0   | 32.8 | 0.01 | 0.1 | 38.4 | 15.5 | 86  | 15.4 | 7.4   | 0.13 |
| D9         | CCHF07 | 5.29 | 11.4  | 12.2 | 2.24  | 19.6 | 37.7 | 7.19 | 63.1 | 71.3 | 1.94 | 17   | 23.1 | 0    | 0   | 32.4 | 0.03 | 0.3 | 40   | 16.3 | 190 | 11.9 | 56.6  | 1.07 |
| D14        | CCHF07 | 5.47 | 7.61  | 12.6 | 4.27  | 56.2 | 39.3 | 2.14 | 28.1 | 71.8 | 1.19 | 15.6 | 23   | 0    | 0   | 32.1 | 0.01 | 0.1 | 41.7 | 17   | 588 | 9.7  | 157.5 | 2.88 |
| D0         | CCHF08 | 5.35 | 7.7   | 12.8 | 5.3   | 68.8 | 38.9 | 1.74 | 22.6 | 72.7 | 0.64 | 8.3  | 23.9 | 0.02 | 0.3 | 32.9 | 0    | 0   | 40.1 | 15.6 | 338 | 11.2 | 105.9 | 1.98 |
| D1         | CCHF08 | 5    | 10.27 | 12   | 8.22  | 80   | 37.3 | 1.58 | 15.4 | 74.6 | 0.36 | 3.5  | 24   | 0.06 | 0.6 | 32.2 | 0.05 | 0.5 | 40   | 15.5 | 338 | 11.3 | 90    | 1.8  |
| D3         | CCHF08 | 5.21 | 7.33  | 12.5 | 5.23  | 71.4 | 39   | 1.55 | 21.1 | 74.9 | 0.51 | 7    | 24   | 0.04 | 0.5 | 32.1 | 0    | 0   | 40.4 | 15.4 | 358 | 11.7 | 91.7  | 1.76 |
| D5         | CCHF08 | 4.83 | 4.61  | 11.7 | 2.74  | 59.4 | 36.1 | 1.32 | 28.6 | 74.7 | 0.52 | 11.3 | 24.2 | 0.03 | 0.7 | 32.4 | 0    | 0   | 40.8 | 15.6 | 332 | 11.2 | 76.8  | 1.59 |
| D7         | CCHF08 | 5.09 | 4.7   | 12.2 | 2.57  | 54.6 | 37.4 | 1.63 | 34.7 | 73.5 | 0.45 | 9.6  | 24   | 0.05 | 1.1 | 32.6 | 0    | 0   | 41   | 15.9 | 340 | 12   | 89.6  | 1.76 |
| D9         | CCHF08 | 5.21 | 8.29  | 12.6 | 4.4   | 53.1 | 39.2 | 3.08 | 37.2 | 75.2 | 0.73 | 8.8  | 24.2 | 0.07 | 0.8 | 32.1 | 0.01 | 0.1 | 41.4 | 15.7 | 294 | 12.4 | 69.8  | 1.34 |
| D14        | CCHF08 | 5.26 | 11.21 | 12.8 | 7.69  | 68.6 | 39.4 | 2.2  | 19.6 | 74.9 | 1.29 | 11.5 | 24.3 | 0.03 | 0.3 | 32.5 | 0    | 0   | 42.5 | 16.3 | 387 | 11   | 191.5 | 3.64 |
| D28        | CCHF08 | 5.53 | 6.03  | 13.4 | 3.58  | 59.4 | 41.6 | 1.69 | 28   | 75.2 | 0.72 | 11.9 | 24.2 | 0.04 | 0.7 | 32.2 | 0    | 0   | 40   | 15.3 | 360 | 11   | 108.9 | 1.97 |

Supplemental Table 2: Complete Blood Chemistry and Hematology for Study 2

| Indian Origin |           |             |                    |                |           |           |                     |                 |                 |                  |                |                 |              |             |              |               |     |     |     |
|---------------|-----------|-------------|--------------------|----------------|-----------|-----------|---------------------|-----------------|-----------------|------------------|----------------|-----------------|--------------|-------------|--------------|---------------|-----|-----|-----|
| Study ID      | Sex       | Age (Yrs)   | Group              |                |           |           |                     |                 |                 |                  |                |                 |              |             |              |               |     |     |     |
| CCHF09        | Female    | 12.0        | Sham               |                |           |           |                     |                 |                 |                  |                |                 |              |             |              |               |     |     |     |
| CCHF10        | Male      | 2.1         |                    |                |           |           |                     |                 |                 |                  |                |                 |              |             |              |               |     |     |     |
| CCHF11        | Female    | 12.2        |                    |                |           |           |                     |                 |                 |                  |                |                 |              |             |              |               |     |     |     |
| CCHF12        | Male      | 2.5         |                    |                |           |           |                     |                 |                 |                  |                |                 |              |             |              |               |     |     |     |
| CCHF13        | Female    | 11.3        |                    |                |           |           |                     |                 |                 |                  |                |                 |              |             |              |               |     |     |     |
| CCHF14        | Female    | 10.0        |                    |                |           |           |                     |                 |                 |                  |                |                 |              |             |              |               |     |     |     |
| CCHF15        | Female    | 11.3        |                    | repNP + repGPC |           |           |                     |                 |                 |                  |                |                 |              |             |              |               |     |     |     |
| CCHF16        | Male      | 2.5         |                    |                |           |           |                     |                 |                 |                  |                |                 |              |             |              |               |     |     |     |
| CCHF17        | Female    | 12.0        |                    |                |           |           |                     |                 |                 |                  |                |                 |              |             |              |               |     |     |     |
| CCHF18        | Male      | 2.1         |                    |                |           |           |                     |                 |                 |                  |                |                 |              |             |              |               |     |     |     |
| CCHF19        | Female    | 12.2        |                    |                |           |           |                     |                 |                 |                  |                |                 |              |             |              |               |     |     |     |
| CCHF20        | Female    | 11.9        |                    |                |           |           |                     |                 |                 |                  |                |                 |              |             |              |               |     |     |     |
| Study Day     | Animal ID | BUN (mg/dL) | Creatinine (mg/dL) | ALT (U/L)      | ALP (U/L) | AST (U/L) | T Bilirubin (mg/dL) | Glucose (mg/dL) | Calcium (mg/dL) | T Protein (g/dL) | Albumin (g/dL) | Globulin (g/dL) | Na+ (mmol/L) | K+ (mmol/L) | Cl- (mmol/L) | tCO2 (mmol/L) | Hem | Lip | lct |
| D-70          | CCHF09    | 12          | 1.1                | 50             | 75        | 48        | 0.3                 | 59              | 10.4            | 7.0              | 5.3            | 1.7             | 145          | 4.6         | 119          | 26            | 0   | 0   | 0   |
| D-63          | CCHF09    | 13          | 1.3                | 63             | 89        | 53        | 0.3                 | 55              | 10.5            | 6.7              | 5.0            | 1.7             | 139          | 4.5         | 117          | 23            | 1   | 0   | 0   |
| D-56          | CCHF09    | 13          | 1.0                | 45             | 81        | 44        | 0.3                 | 62              | 10.1            | 6.7              | 4.9            | 1.8             | 147          | 4.2         | 112          | 29            | 1   | 0   | 0   |
| D-49          | CCHF09    | 13          | 0.9                | 33             | 88        | 44        | 0.3                 | 63              | 10.9            | 6.9              | 5.1            | 1.8             | 142          | 4.6         | 111          | 29            | 0   | 0   | 0   |
| D-42          | CCHF09    | 10          | 0.9                | 29             | 86        | 45        | 0.3                 | 62              | 10.2            | 7.0              | 5.0            | 2.0             | 141          | 4.7         | 117          | 25            | 0   | 0   | 0   |
| D-35          | CCHF09    | 11          | 0.8                | 40             | 76        | 42        | 0.3                 | 62              | 10.6            | 7.0              | 5.1            | 1.9             | 145          | 4.7         | 119          | 27            | 0   | 0   | 0   |
| D-28          | CCHF09    | 12          | 1.1                | 53             | 83        | 47        | 0.3                 | 52              | 10.8            | 7.1              | 5.0            | 2.0             | 150          | 4.7         | 113          | 27            | 1   | 0   | 0   |
| D-21          | CCHF09    | 12          | 1.1                | 31             | 85        | 47        | 0.3                 | 60              | 10.5            | 6.8              | 4.9            | 1.9             | 148          | 4.3         | 113          | 29            | 0   | 0   | 0   |
| D-14          | CCHF09    | 12          | 1.1                | 33             | 72        | 45        | 0.3                 | 53              | 10.5            | 7.0              | 5.1            | 1.9             | 150          | 4.3         | 120          | 27            | 0   | 0   | 0   |
| D-7           | CCHF09    | 11          | 1.3                | 52             | 79        | 57        | 0.3                 | 75              | 11.4            | 6.8              | 5.0            | 1.8             | 145          | 4.7         | 114          | 29            | 0   | 0   | 0   |
| D0            | CCHF09    | 12          | 1.2                | 47             | 77        | 52        | 0.3                 | 71              | 10.6            | 6.5              | 4.8            | 1.7             | 147          | 4.0         | 109          | 25            | 0   | 0   | 0   |
| D1            | CCHF09    | 13          | 1.1                | 48             | 85        | 50        | 0.4                 | 59              | 10.6            | 6.9              | 5.0            | 1.9             | 146          | 4.4         | 111          | 25            | 0   | 0   | 0   |
| D3            | CCHF09    | 12          | 0.9                | 48             | 86        | 49        | 0.3                 | 67              | 10.2            | 6.4              | 4.6            | 1.8             | 144          | 3.9         | 110          | 27            | 0   | 0   | 0   |
| D5            | CCHF09    | 12          | 1.0                | 38             | 89        | 68        | 0.2                 | 76              | 9.8             | 6.4              | 4.6            | 1.8             | 146          | 3.5         | 112          | 24            | 0   | 0   | 0   |
| D7            | CCHF09    | 14          | 0.8                | 90             | 113       | 315       | 0.4                 | 70              | 9.5             | 6.3              | 4.4            | 1.9             | 143          | 3.8         | 108          | 26            | 0   | 0   | 0   |
| D-70          | CCHF10    | 10          | 0.6                | 25             | 622       | 44        | 0.4                 | 82              | 10.7            | 7.0              | 5.4            | 1.6             | 145          | 4.4         | 119          | 29            | 0   | 0   | 0   |
| D-63          | CCHF10    | 13          | 1.0                | 24             | 537       | 38        | 0.4                 | 75              | 10.6            | 6.9              | 5.2            | 1.7             | 144          | 4.6         | 115          | 26            | 0   | 0   | 0   |
| D-56          | CCHF10    | 12          | 0.6                | 22             | 548       | 40        | 0.4                 | 83              | 10.9            | 7.0              | 5.0            | 2.0             | 147          | 4.2         | 108          | 28            | 0   | 0   | 0   |
| D-49          | CCHF10    | 9           | 0.5                | 28             | 612       | 36        | 0.4                 | 88              | 11.0            | 7.0              | 5.1            | 1.9             | 145          | 4.7         | 111          | 31            | 0   | 0   | 0   |
| D-42          | CCHF10    | 14          | 0.8                | 23             | 580       | 42        | 0.3                 | 86              | 10.7            | 7.0              | 5.0            | 1.9             | 147          | 4.6         | 114          | 30            | 0   | 0   | 0   |
| D-35          | CCHF10    | 12          | 0.3                | 30             | 581       | 44        | 0.3                 | 87              | 10.7            | 6.9              | 5.0            | 1.9             | 145          | 4.6         | 114          | 30            | 0   | 0   | 0   |
| D-28          | CCHF10    | 14          | 0.8                | 24             | 553       | 43        | 0.4                 | 86              | 10.8            | 7.3              | 5.2            | 2.1             | 149          | 4.6         | 110          | 30            | 0   | 0   | 0   |
| D-21          | CCHF10    | 10          | 0.7                | 25             | 574       | 37        | 0.2                 | 82              | 10.8            | 7.1              | 5.0            | 2.1             | 149          | 4.3         | 113          | 28            | 0   | 0   | 0   |
| D-14          | CCHF10    | 19          | 0.8                | 23             | 492       | 35        | 0.3                 | 98              | 10.8            | 7.1              | 5.1            | 2.0             | 151          | 3.9         | 112          | 27            | 0   | 0   | 0   |
| D-7           | CCHF10    | 12          | 0.7                | 36             | 545       | 49        | 0.1                 | 87              | 11.0            | 6.6              | 5.0            | 1.6             | 145          | 3.9         | 109          | 29            | 0   | 0   | 0   |
| D0            | CCHF10    | 11          | 0.9                | 28             | 522       | 37        | 0.1                 | 89              | 10.2            | 6.9              | 4.9            | 2.0             | 150          | 3.9         | 113          | 26            | 0   | 0   | 0   |
| D1            | CCHF10    | 16          | 0.6                | 32             | 452       | 41        | 0.2                 | 78              | 10.3            | 6.6              | 4.8            | 1.8             | 151          | 4.0         | 115          | 28            | 0   | 0   | 0   |
| D3            | CCHF10    | 15          | 0.8                | 45             | 462       | 52        | 0.1                 | 83              | 9.5             | 6.6              | 4.7            | 1.9             | 147          | 3.8         | 108          | 27            | 0   | 0   | 0   |
| D5            | CCHF10    | 14          | 1.0                | 64             | 503       | 97        | 0.2                 | 85              | 8.9             | 6.5              | 4.5            | 2.0             | 146          | 3.5         | 107          | 25            | 0   | 0   | 0   |
| D7            | CCHF10    | 15          | 1.1                | 89             | 515       | 211       | 0.1                 | 82              | 9.4             | 6.0              | 4.0            | 2.0             | 143          | 3.4         | 107          | 30            | 0   | 0   | 0   |
| D-70          | CCHF11    | 11          | 0.7                | 62             | 92        | 38        | 0.3                 | 64              | 10.0            | 7.1              | 4.6            | 2.5             | 141          | 3.5         | 117          | 28            | 0   | 0   | 0   |
| D-63          | CCHF11    | 12          | 1.0                | 50             | 106       | 40        | 0.3                 | 71              | 10.2            | 7.4              | 4.5            | 2.9             | 140          | 3.9         | 113          | 24            | 1   | 0   | 0   |
| D-56          | CCHF11    | 10          | 0.7                | 52             | 107       | 34        | 0.3                 | 76              | 10.1            | 7.0              | 4.3            | 2.7             | 144          | 3.7         | 111          | 28            | 1   | 0   | 0   |
| D-49          | CCHF11    | 11          | 1.0                | 37             | 107       | 35        | 0.3                 | 74              | 10.5            | 7.5              | 4.6            | 2.9             | 141          | 3.8         | 111          | 27            | 0   | 0   | 0   |
| D-42          | CCHF11    | 11          | 0.9                | 22             | 89        | 28        | 0.3                 | 73              | 10.3            | 7.6              | 4.5            | 3.1             | 143          | 3.9         | 115          | 27            | 0   | 0   | 0   |
| D-35          | CCHF11    | 11          | 0.9                | 51             | 85        | 42        | 0.3                 | 63              | 10.2            | 7.2              | 4.4            | 2.8             | 140          | 4.8         | 113          | 26            | 2   | 0   | 0   |
| D-28          | CCHF11    | 13          | 1.1                | 36             | 87        | 31        | 0.3                 | 73              | 10.3            | 7.6              | 4.4            | 3.2             | 148          | 3.9         | 112          | 29            | 0   | 0   | 0   |
| D-21          | CCHF11    | 10          | 1.2                | 35             | 84        | 35        | 0.3                 | 68              | 10.0            | 7.1              | 4.4            | 2.7             | 145          | 3.7         | 114          | 27            | 0   | 0   | 0   |
| D-14          | CCHF11    | 13          | 1.0                | 41             | 85        | 33        | 0.4                 | 79              | 10.3            | 7.5              | 4.6            | 2.9             | 148          | 3.6         | 114          | 26            | 0   | 0   | 0   |
| D-7           | CCHF11    | 11          | 1.0                | 229            | 106       | 103       | 0.4                 | 86              | 10.5            | 7.2              | 4.6            | 2.5             | 141          | 3.8         | 109          | 28            | 0   | 1   | 0   |
| D0            | CCHF11    | 11          | 0.9                | 71             | 112       | 39        | 0.2                 | 73              | 10.1            | 7.1              | 4.3            | 2.8             | 143          | 3.8         | 108          | 24            | 1   | 0   | 0   |
| D1            | CCHF11    | 14          | 1.0                | 61             | 114       | 37        | 0.2                 | 80              | 10.4            | 7.2              | 4.4            | 2.8             | 145          | 4.0         | 112          | 27            | 0   | 0   | 0   |
| D3            | CCHF11    | 10          | 0.8                | 61             | 109       | 57        | 0.3                 | 79              | 9.7             | 7.1              | 4.2            | 2.9             | 145          | 4.0         | 113          | 27            | 0   | 0   | 0   |
| D5            | CCHF11    | 11          | 1.3                | 83             | 114       | 61        | 0.2                 | 86              | 9.9             | 6.8              | 4.1            | 2.6             | 144          | 4.0         | 109          | 27            | 0   | 0   | 0   |
| D7            | CCHF11    | 8           | 0.6                | 133            | 113       | 119       | 0.3                 | 61              | 9.5             | 6.3              | 4.0            | 2.3             | 143          | 3.8         | 112          | 32            | 0   | 0   | 0   |
| D-70          | CCHF12    | 14          | 0.7                | 36             | 657       | 42        | 0.3                 | 65              | 10.8            | 6.1              | 4.9            | 1.2             | 143          | 4.5         | 116          | 28            | 0   | 0   | 0   |
| D-63          | CCHF12    | 16          | 0.5                | 32             | 734       | 36        | 0.3                 | 62              | 10.8            | 6.4              | 5.0            | 1.4             | 145          | 3.9         | 116          | 23            | 0   | 0   | 0   |
| D-56          | CCHF12    | 17          | 0.5                | 36             | 661       | 38        | 0.4                 | 67              | 10.4            | 6.3              | 4.8            | 1.5             | 146          | 3.7         | 107          | 27            | 0   | 0   | 0   |
| D-49          | CCHF12    | 12          | 0.6                | 31             | 587       | 38        | 0.3                 | 76              | 10.8            | 6.4              | 5.0            | 1.4             | 146          | 4.2         | 111          | 28            | 0   | 0   | 0   |
| D-42          | CCHF12    | 18          | 0.5                | 25             | 530       | 36        | 0.3                 | 71              | 10.8            | 6.6              | 5.0            | 1.6             | 146          | 4.5         | 112          | 30            | 0   | 0   | 0   |
| D-35          | CCHF12    | 15          | 0.5                | 30             | 582       | 37        | 0.3                 | 70              | 10.6            | 6.5              | 5.0            | 1.5             | 146          | 4.4         | 114          | 27            | 0   | 0   | 0   |
| D-28          | CCHF12    | 15          | 0.8                | 25             | 631       | 37        | 0.3                 | 69              | 11.0            | 6.6              | 5.1            | 1.6             | 150          | 4.0         | 107          | 29            | 0   | 0   | 0   |
| D-21          | CCHF12    | 13          | 0.6                | 30             | 619       | 36        | 0.3                 | 71              | 10.3            | 6.3              | 4.8            | 1.5             | 151          | 4.0         | 116          | 24            | 0   | 0   | 0   |
| D-14          | CCHF12    | 18          | 0.6                | 28             | 577       | 35        | 0.3                 | 65              | 10.5            | 6.8              | 5.2            | 1.6             | 151          | 3.6         | 115          | 26            | 0   | 0   | 0   |
| D-7           | CCHF12    | 11          | 1.0                | 34             | 585       | 46        | 0.4                 | 79              | 11.0            | 6.4              | 5.0            | 1.4             | 150          | 3.8         | 114          | 28            | 0   | 0   | 0   |
| D0            | CCHF12    | 13          | 0.5                | 36             | 534       | 36        | 0.3                 | 78              | 10.5            | 6.4              | 4.9            | 1.5             | 150          | 3.5         | 112          | 25            | 0   | 0   | 0   |
| D1            | CCHF12    | 17          | 0.6                | 35             | 520       | 37        | 0.4                 | 73              | 10.5            | 6.4              | 5.0            | 1.5             | 146          | 4.0         | 113          | 24            | 0   | 0   | 0   |
| D3            | CCHF12    | 18          | 0.3                | 36             | 541       | 45        | 0.3                 | 70              | 9.6             | 6.0              | 4.5            | 1.5             | 147          | 4.0         | 111          | 25            | 0   | 0   | 0   |
| D5            | CCHF12    | 14          | 0.9                | 59             | 479       | 55        | 0.4                 | 79              | 10.0            | 6.0              | 4.6            | 1.5             | 147          | 4.0         | 108          | 26            | 0   | 0   | 0   |
| D7            | CCHF12    | 16          | 0.6                | 72             | 494       | 71        | 0.3                 | 61              | 10.3            | 5.6              | 4.2            | 1.4             | 145          | 4.2         | ---          | 32            | 0   | 0   | 0   |
| D7 (return)   | CCHF12    | 16          | 0.6                | 72             | 497       | 68        | 0.3                 | 59              | 10.6            | 5.5              | 4.2            | 1.3             | 150          | 3.7         | 112          | 29            | 0   | 0   | 0   |
| D-70          | CCHF13    | 15          | 1.2                | 245            | 89        | 69        | 0.4                 | 56              | 10.4            | 6.8              | 5.0            | 1.8             | 147          | 4.2         | 115          | 27            | 0   | 0   | 0   |
| D-63          | CCHF13    | 15          | 1.0                | 336            | 104       | 129       | 0.4                 | 61              | 10.5            | 6.6              | 4.8            | 1.9             | 144          | 4.3         | 115          | 26            | 0   | 0   | 0   |
| D-56          | CCHF13    | 15          | 1.0                | 165            | 101       | 50        | 0.4                 | 62              | 10.6            | 6.6              | 4.8            | 1.8             | 146          | 4.1         | 115          | 29            | 0   | 0   | 0   |
| D-49          | CCHF13    | 16          | 1.1                | 82             | 83        | 49        | 0.5                 | 54              | 10.0            | 6.8              | 4.8            | 2.0             | 147          | 4.3         | 108          | 27            | 0   | 0   | 0   |
| D-42          | CCHF13    | 15          | 1.1                |                |           |           |                     |                 |                 |                  |                |                 |              |             |              |               |     |     |     |



|              |           |            |            |            |              |           |         |               |            |              |           |          |             |          |             |              |           |             |            |            |          |             |          |
|--------------|-----------|------------|------------|------------|--------------|-----------|---------|---------------|------------|--------------|-----------|----------|-------------|----------|-------------|--------------|-----------|-------------|------------|------------|----------|-------------|----------|
| D7           | CCHF15    | 12         | 0.9        | 68         | 96           | 55        | 0.4     | 79            | 10.3       | 7.0          | 4.9       | 2.0      | 147         | 3.9      | 112         | 25           | 0         | 0           | 0          |            |          |             |          |
| D-70         | CCHF16    | 9          | 0.5        | 30         | 552          | 36        | 0.4     | 74            | 11.1       | 6.5          | 5.2       | 1.3      | 149         | 4.0      | 116         | 26           | 0         | 0           | 0          |            |          |             |          |
| D-63         | CCHF16    | 11         | 0.6        | 24         | 510          | 34        | 0.4     | 76            | 10.8       | 7.0          | 5.1       | 1.9      | 147         | 4.6      | 114         | 23           | 0         | 0           | 0          |            |          |             |          |
| D-56         | CCHF16    | 10         | 0.7        | 22         | 564          | 35        | 0.3     | 73            | 11.0       | 6.7          | 5.1       | 1.6      | 147         | 4.3      | 115         | 24           | 0         | 0           | 0          |            |          |             |          |
| D-49         | CCHF16    | 12         | 0.9        | 27         | 522          | 35        | 0.4     | 67            | 11.3       | 7.1          | 5.3       | 1.8      | 149         | 4.1      | 109         | 24           | 0         | 0           | 0          |            |          |             |          |
| D-42         | CCHF16    | 14         | 0.5        | 40         | 477          | 40        | 0.4     | 67            | 11.2       | 6.8          | 5.1       | 1.7      | 151         | 4.5      | 115         | 26           | 0         | 0           | 0          |            |          |             |          |
| D-35         | CCHF16    | 11         | 0.8        | 30         | 495          | 35        | 0.4     | 91            | 11.2       | 6.9          | 5.1       | 1.8      | 149         | 4.3      | 115         | 25           | 0         | 0           | 0          |            |          |             |          |
| D-28         | CCHF16    | 11         | 1.2        | 53         | 474          | 39        | 0.4     | 76            | 10.9       | 6.8          | 5.0       | 1.7      | 152         | 4.4      | 115         | 27           | 0         | 0           | 0          |            |          |             |          |
| D-21         | CCHF16    | 14         | 0.8        | 28         | 422          | 37        | 0.3     | 65            | 10.7       | 6.8          | 4.9       | 2.0      | 151         | 4.5      | 112         | 24           | 0         | 0           | 0          |            |          |             |          |
| D-14         | CCHF16    | 15         | 0.6        | 31         | 456          | 37        | 0.4     | 62            | 11.0       | 7.0          | 5.2       | 1.9      | 151         | 4.2      | 113         | 24           | 0         | 0           | 0          |            |          |             |          |
| D-7          | CCHF16    | 9          | 0.6        | 47         | 512          | 45        | 0.4     | 83            | 11.2       | 6.7          | 5.0       | 1.7      | 148         | 4.4      | 109         | 27           | 0         | 0           | 0          |            |          |             |          |
| D0           | CCHF16    | 11         | 0.7        | 32         | 469          | 37        | 0.3     | 61            | 10.5       | 6.5          | 4.9       | 1.6      | 153         | 4.1      | 119         | 27           | 0         | 0           | 0          |            |          |             |          |
| D1           | CCHF16    | 10         | 0.7        | 39         | 415          | 41        | 0.4     | 75            | 10.7       | 6.5          | 4.9       | 1.5      | 149         | 4.2      | 109         | 26           | 0         | 0           | 0          |            |          |             |          |
| D3           | CCHF16    | 13         | 0.7        | 39         | 361          | 33        | 0.3     | 65            | 10.4       | 6.6          | 4.8       | 1.8      | 147         | 3.9      | 109         | 26           | 0         | 0           | 0          |            |          |             |          |
| D5           | CCHF16    | 11         | 1.0        | 41         | 368          | 30        | 0.4     | 64            | 10.7       | 6.7          | 5.0       | 1.7      | 147         | 4.0      | 107         | 28           | 0         | 0           | 0          |            |          |             |          |
| D7           | CCHF16    | 9          | 0.7        | 39         | 397          | 40        | 0.3     | 68            | 10.8       | 6.7          | 4.8       | 1.8      | 147         | 4.1      | 110         | 27           | 0         | 0           | 0          |            |          |             |          |
| D-70         | CCHF17    | 13         | 1.0        | 70         | 73           | 45        | 0.3     | 68            | 9.6        | 7.0          | 5.0       | 2.0      | 151         | 3.5      | 113         | 28           | 0         | 0           | 0          |            |          |             |          |
| D-63         | CCHF17    | 11         | 1.1        | 41         | 91           | 38        | 0.3     | 82            | 10.7       | 7.3          | 5.3       | 2.0      | 147         | 4.1      | 117         | 26           | 0         | 0           | 0          |            |          |             |          |
| D-56         | CCHF17    | 11         | 1.0        | 47         | 90           | 39        | 0.3     | 74            | 10.2       | 7.1          | 5.3       | 1.8      | 145         | 3.8      | 112         | 28           | 0         | 0           | 0          |            |          |             |          |
| D-49         | CCHF17    | 12         | 0.9        | 57         | 89           | 41        | 0.3     | 81            | 10.2       | 7.1          | 5.0       | 2.0      | 145         | 3.9      | 112         | 25           | 0         | 0           | 0          |            |          |             |          |
| D-42         | CCHF17    | 16         | 0.6        | 58         | 73           | 44        | 0.3     | 70            | 10.6       | 7.2          | 5.0       | 2.2      | 144         | 3.7      | 114         | 26           | 0         | 0           | 0          |            |          |             |          |
| D-35         | CCHF17    | 16         | 0.9        | 43         | 71           | 38        | 0.3     | 70            | 11.0       | 7.1          | 4.9       | 2.2      | 150         | 4.1      | 113         | 27           | 2         | 0           | 0          |            |          |             |          |
| D-28         | CCHF17    | 15         | 1.3        | 58         | 77           | 41        | 0.3     | 70            | 10.0       | 7.1          | 5.0       | 2.1      | 146         | 3.9      | 109         | 26           | 0         | 0           | 0          |            |          |             |          |
| D-21         | CCHF17    | 10         | 0.9        | 67         | 90           | 48        | 0.3     | 88            | 10.6       | 7.2          | 4.9       | 2.3      | 147         | 3.8      | 113         | 27           | 0         | 0           | 0          |            |          |             |          |
| D-14         | CCHF17    | 16         | 0.9        | 59         | 75           | 41        | 0.3     | 75            | 10.5       | 7.2          | 5.0       | 2.2      | 148         | 3.9      | 114         | 27           | 1         | 0           | 0          |            |          |             |          |
| D-7          | CCHF17    | 14         | 1.1        | 60         | 78           | 50        | 0.3     | 83            | 10.3       | 7.0          | 4.9       | 2.1      | 147         | 4.0      | 109         | 28           | 0         | 0           | 0          |            |          |             |          |
| D0           | CCHF17    | 11         | 1.0        | 52         | 78           | 38        | 0.3     | 72            | 10.3       | 7.2          | 5.0       | 2.2      | 149         | 4.1      | 115         | 28           | 0         | 0           | 0          |            |          |             |          |
| D1           | CCHF17    | 15         | 1.0        | 57         | 81           | 49        | 0.3     | 75            | 10.3       | 6.9          | 4.9       | 2.0      | 145         | 3.7      | 110         | 27           | 0         | 0           | 0          |            |          |             |          |
| D3           | CCHF17    | 13         | 0.8        | 73         | 103          | 110       | 0.4     | 76            | 9.3        | 6.5          | 4.5       | 2.0      | 146         | 3.5      | 112         | 24           | 0         | 0           | 0          |            |          |             |          |
| D5           | CCHF17    | 14         | 1.1        | 214        | 181          | 295       | 0.4     | 72            | 8.9        | 6.4          | 4.3       | 2.1      | 143         | 3.9      | 111         | 24           | 0         | 0           | 0          |            |          |             |          |
| D7           | CCHF17    | 7          | 1.0        | 184        | 271          | 162       | 0.2     | 70            | 9.8        | 6.4          | 4.1       | 2.2      | 148         | 4.2      | 112         | 31           | 0         | 0           | 0          |            |          |             |          |
| D-70         | CCHF18    | 11         | 0.9        | 32         | 792          | 43        | 0.4     | 74            | 10.9       | 6.8          | 5.0       | 1.8      | 154         | 4.3      | 118         | 22           | 0         | 0           | 0          |            |          |             |          |
| D-63         | CCHF18    | 12         | 0.9        | 27         | 712          | 35        | 0.4     | 84            | 11.1       | 6.9          | 5.1       | 1.8      | 149         | 4.1      | 117         | 23           | 0         | 0           | 0          |            |          |             |          |
| D-56         | CCHF18    | 4          | 0.2        | 11         | 253          | 16        | 0.3     | 30            | 4.1        | 2.3          | 1.4       | 0.9      | <100        | <1.5     | <7.5        | 7            | 0         | 0           | 0          |            |          |             |          |
| D-56 (rerun) | CCHF18    | 13         | 0.5        | 29         | 739          | 36        | 0.4     | 76            | 11.1       | 6.8          | 4.8       | 2.0      | 151         | 4.2      | 112         | 24           | 0         | 0           | 0          |            |          |             |          |
| D-49         | CCHF18    | 13         | 0.7        | 28         | 822          | 37        | 0.4     | 70            | 11.3       | 6.9          | 5.0       | 1.9      | 148         | 4.2      | 111         | 24           | 0         | 0           | 0          |            |          |             |          |
| D-42         | CCHF18    | 16         | 0.6        | 25         | 737          | 29        | 0.3     | 71            | 11.1       | 6.9          | 4.8       | 2.0      | 152         | 4.3      | 117         | 25           | 0         | 0           | 0          |            |          |             |          |
| D-35         | CCHF18    | 15         | 0.7        | 31         | 793          | 40        | 0.3     | 78            | 10.8       | 6.9          | 4.9       | 2.0      | 150         | 4.2      | 117         | 22           | 0         | 0           | 0          |            |          |             |          |
| D-28         | CCHF18    | 12         | 0.6        | 28         | 742          | 38        | 0.3     | 65            | 11.0       | 6.7          | 4.8       | 1.9      | 151         | 4.5      | 114         | 27           | 0         | 0           | 0          |            |          |             |          |
| D-21         | CCHF18    | 14         | 0.7        | 27         | 673          | 35        | 0.2     | 67            | 10.9       | 6.6          | 4.6       | 2.0      | 153         | 4.4      | 113         | 25           | 0         | 0           | 0          |            |          |             |          |
| D-14         | CCHF18    | 14         | 1.0        | 26         | 722          | 34        | 0.2     | 76            | 11.3       | 7.1          | 5.0       | 2.1      | 153         | 4.3      | 116         | 24           | 0         | 0           | 0          |            |          |             |          |
| D-7          | CCHF18    | 12         | 1.1        | 30         | 780          | 41        | 0.2     | 77            | 11.2       | 6.6          | 4.9       | 1.7      | 148         | 4.1      | 111         | 26           | 0         | 0           | 0          |            |          |             |          |
| D0           | CCHF18    | 11         | 0.7        | 39         | 804          | 42        | 0.3     | 64            | 11.1       | 6.8          | 5.0       | 1.9      | 152         | 4.4      | 118         | 26           | 0         | 0           | 0          |            |          |             |          |
| D1           | CCHF18    | 13         | 0.9        | 37         | 724          | 39        | 0.3     | 71            | 10.9       | 6.6          | 4.8       | 1.8      | 154         | 4.4      | 118         | 26           | 0         | 0           | 0          |            |          |             |          |
| D3           | CCHF18    | 18         | 0.5        | 44         | 676          | 43        | 0.1     | 68            | 10.0       | 6.6          | 4.7       | 1.9      | 148         | 3.7      | 114         | 25           | 0         | 0           | 0          |            |          |             |          |
| D5           | CCHF18    | 13         | 1.0        | 48         | 681          | 44        | 0.6     | 73            | 10.4       | 6.6          | 4.8       | 1.8      | 146         | 4.0      | 111         | 26           | 0         | 0           | 0          |            |          |             |          |
| D7           | CCHF18    | 12         | 0.6        | 45         | 734          | 45        | 0.3     | 63            | 11.0       | 6.7          | 4.8       | 1.9      | 150         | 4.1      | 114         | 27           | 0         | 0           | 0          |            |          |             |          |
| D-70         | CCHF19    | 17         | 1.3        | 65         | 73           | 37        | 0.3     | 64            | 10.4       | 7.0          | 5.2       | 1.8      | 151         | 4.2      | 117         | 26           | 0         | 0           | 0          |            |          |             |          |
| D-63         | CCHF19    | 18         | 1.3        | 75         | 87           | 42        | 0.3     | 68            | 10.2       | 6.8          | 5.3       | 1.5      | 145         | 4.0      | 118         | 25           | 0         | 0           | 0          |            |          |             |          |
| D-56         | CCHF19    | 17         | 1.1        | 44         | 87           | 29        | 0.3     | 64            | 10.2       | 6.8          | 5.3       | 1.5      | 148         | 4.1      | 119         | 27           | 0         | 0           | 0          |            |          |             |          |
| D-49         | CCHF19    | 17         | 1.2        | 41         | 90           | 32        | 0.3     | 64            | 10.6       | 6.8          | 5.2       | 1.7      | 149         | 3.9      | 113         | 26           | 0         | 0           | 0          |            |          |             |          |
| D-42         | CCHF19    | 17         | 1.1        | 81         | 83           | 45        | 0.3     | 63            | 10.5       | 6.9          | 5.1       | 1.8      | 151         | 4.1      | 119         | 26           | 0         | 0           | 0          |            |          |             |          |
| D-35         | CCHF19    | 18         | 1.1        | 52         | 82           | 37        | 0.3     | 69            | 10.4       | 6.7          | 5.0       | 1.7      | 149         | 4.2      | 115         | 26           | 0         | 0           | 0          |            |          |             |          |
| D-28         | CCHF19    | 18         | 1.3        | 53         | 73           | 34        | 0.3     | 67            | 10.2       | 6.9          | 5.1       | 1.8      | 151         | 4.1      | 114         | 27           | 0         | 0           | 0          |            |          |             |          |
| D-21         | CCHF19    | 14         | 1.4        | 58         | 85           | 37        | 0.3     | 72            | 10.2       | 6.6          | 5.0       | 1.6      | 147         | 4.1      | 121         | 26           | 0         | 0           | 0          |            |          |             |          |
| D-14         | CCHF19    | 21         | 1.1        | 66         | 79           | 35        | 0.3     | 64            | 10.6       | 7.1          | 5.4       | 1.7      | 152         | 4.3      | 116         | 28           | 0         | 0           | 0          |            |          |             |          |
| D-7          | CCHF19    | 16         | 1.5        | 59         | 80           | 32        | 0.4     | 64            | 10.3       | 6.7          | 5.2       | 1.5      | 145         | 4.0      | 113         | 29           | 0         | 0           | 0          |            |          |             |          |
| D0           | CCHF19    | 18         | 1.5        | 61         | 77           | 38        | 0.3     | 54            | 10.3       | 7.1          | 5.2       | 1.9      | 151         | 4.2      | 119         | 27           | 0         | 0           | 0          |            |          |             |          |
| D1           | CCHF19    | 18         | 1.4        | 67         | 73           | 50        | 0.4     | 71            | 10.1       | 6.6          | 5.0       | 1.6      | 150         | 4.0      | 118         | 26           | 0         | 0           | 0          |            |          |             |          |
| D3           | CCHF19    | 11         | 1.3        | 69         | 94           | 56        | 0.4     | 82            | 8.9        | 6.3          | 4.8       | 1.5      | 147         | 3.7      | 113         | 26           | 0         | 0           | 0          |            |          |             |          |
| D5           | CCHF19    | 11         | 1.4        | 66         | 88           | 69        | 0.4     | 73            | 9.4        | 6.1          | 4.7       | 1.5      | 143         | 3.5      | 108         | 28           | 0         | 0           | 0          |            |          |             |          |
| D7           | CCHF19    | 10         | 1.1        | 54         | 85           | 40        | 0.3     | 70            | 9.3        | 6.5          | 4.8       | 1.7      | 149         | 3.9      | 114         | 28           | 0         | 0           | 0          |            |          |             |          |
| D-70         | CCHF20    | 15         | 0.9        | 38         | 120          | 34        | 0.4     | 65            | 9.5        | 6.4          | 4.7       | 1.7      | 148         | 3.6      | 113         | 24           | 0         | 0           | 0          |            |          |             |          |
| D-63         | CCHF20    | 16         | 1.0        | 28         | 145          | 33        | 0.4     | 58            | 9.6        | 6.4          | 4.9       | 1.5      | 143         | 3.3      | 116         | 23           | 0         | 0           | 0          |            |          |             |          |
| D-56         | CCHF20    | 16         | 0.9        | 44         | 126          | 33        | 0.4     | 61            | 9.7        | 6.5          | 5.0       | 1.5      | 146         | 3.6      | 115         | 25           | 0         | 0           | 0          |            |          |             |          |
| D-49         | CCHF20    | 15         | 1.1        | 42         | 131          | 37        | 0.5     | 61            | 9.8        | 6.6          | 5.1       | 1.7      | 146         | 3.5      | 113         | 24           | 0         | 0           | 0          |            |          |             |          |
| D-42         | CCHF20    | 15         | 0.9        | 32         | 129          | 32        | 0.3     | 69            | 10.2       | 6.7          | 4.9       | 1.8      | 153         | 3.9      | 115         | 27           | 0         | 0           | 0          |            |          |             |          |
| D-35         | CCHF20    | 14         | 0.7        | 51         | 133          | 35        | 0.3     | 66            | 9.9        | 6.8          | 4.9       | 1.8      | 150         | 4.0      | 115         | 27           | 0         | 0           | 0          |            |          |             |          |
| D-28         | CCHF20    | 15         | 1.1        | 42         | 123          | 29        | 0.4     | 65            | 9.8        | 6.7          | 5.0       | 1.7      | 150         | 4.0      | 113         | 27           | 0         | 0           | 0          |            |          |             |          |
| D-21         | CCHF20    | 15         | 0.7        | 46         | 125          | 43        | 0.3     | 75            | 10.0       | 6.8          | 4.9       | 1.9      | 151         | 3.9      | 117         | 26           | 0         | 0           | 0          |            |          |             |          |
| D-14         | CCHF20    | 19         | 0.8        | 40         | 114          | 39        | 0.4     | 66            | 10.2       | 6.9          | 5.1       | 1.8      | 150         | 4.1      | 115         | 23           | 1         | 0           | 0          |            |          |             |          |
| D-7          | CCHF20    | 13         | 0.7        | 42         | 112          | 36        | 0.4     | 67            | 9.7        | 6.6          | 4.9       | 1.6      | 149         | 4.0      | 113         | 28           | 0         | 0           | 0          |            |          |             |          |
| D0           | CCHF20    | 14         | 1.0        | 39         | 115          | 35        | 0.3     | 66            | 9.6        | 6.8          | 5.0       | 1.8      | 150         | 3.9      | 119         | 27           | 0         | 0           | 0          |            |          |             |          |
| D1           | CCHF20    | 14         | 1.0        | 36         | 109          | 37        | 0.4     | 65            | 9.4        | 6.4          | 4.8       | 1.7      | 149         | 3.6      | 118         | 26           | 0         | 0           | 0          |            |          |             |          |
| D3           | CCHF20    | 15         | 1.0        | 48         | 129          | 51        | 0.4     | 65            | 8.6        | 6.8          | 5.0       | 1.8      | 144         | 4.0      | 113         | 24           | 0         | 0           | 0          |            |          |             |          |
| D5           | CCHF20    | 11         | 1.1        | 36         | 122          | 47        | 0.5     | 67            | 9.4        | 6.5          | 4.7       | 1.8      | 142         | 3.1      | 113         | 23           | 0         | 0           | 0          |            |          |             |          |
| D7           | CCHF20    | 13         | 1.0        | 53         | 197          | 127       | 0.5     | 69            | 9.1        | 6.3          | 4.5       | 1.8      | 143         | 3.2      | 110         | 26           | 0         | 0           | 0          |            |          |             |          |
| Study Day    | Animal ID | RBC (M/uL) | WBC (K/uL) | HGB (g/dL) | NEUT# (K/uL) | NEUT% (%) | HCT (%) | LYMPH# (K/uL) | LYMPH% (%) | MONO# (K/uL) | MONO% (%) | MCH (pg) | EOS# (K/uL) | EOS% (%) | MCHC (g/dL) | BASO# (K/uL) | BASO% (%) | ROW SD (fL) | RDW CV (%) | PLT (K/uL) | MPV (fL) | RET# (K/uL) | RET% (%) |
| D-70         | CCHF09    | 5.98       | 6.67       | 14         | 4.29         | 64.3      | 42      | 1.78          | 26.7       | 70.2         | 0.6       | 9        | 0.33        | 0        | 0           | 0            | 0         | 37.7        | 16         | 411        | 10.8     | 76.5        | 1.28     |
| D-63         | CCHF09    | 5.76       | 8.78       | 13.3       | 5.38         | 61.3      | 40.4    |               |            |              |           |          |             |          |             |              |           |             |            |            |          |             |          |

|            |        |      |       |      |       |      |      |      |      |      |      |      |      |      |      |      |      |     |      |      |     |      |       |      |
|------------|--------|------|-------|------|-------|------|------|------|------|------|------|------|------|------|------|------|------|-----|------|------|-----|------|-------|------|
| D0         | CCHF11 | 6.24 | 7.73  | 14.3 | 3.35  | 43.3 | 43   | 3.97 | 51.4 | 68.9 | 0.41 | 5.3  | 22.9 | 0    | 0    | 33.3 | 0    | 0   | 34.9 | 15.3 | 75  | 11.4 | 98.6  | 1.58 |
| D0 (rerun) | CCHF11 | 6.45 | 8.12  | 14.8 | 3.44  | 42.3 | 43.5 | 4.04 | 49.8 | 67.4 | 0.61 | 7.5  | 22.9 | 0    | 0    | 34   | 0.03 | 0.4 | 34.9 | 15.9 | 184 | 12.3 | 107.1 | 1.66 |
| D0 (rerun) | CCHF11 | 6.21 | 7.86  | 14.2 | 3.33  | 42.4 | 42.5 | 3.81 | 48.5 | 68.4 | 0.71 | 9    | 22.9 | 0    | 0    | 33.4 | 0.01 | 0.1 | 34.9 | 15.3 | 134 | 11   | 98.1  | 1.58 |
| D0 (rerun) | CCHF11 | 6.49 | 8.39  | 15.1 | 3.47  | 41.3 | 43.6 | 4.01 | 47.8 | 67.2 | 0.77 | 9.2  | 23.3 | 0.04 | 0.5  | 34.6 | 0.1  | 1.2 | 35   | 15.9 | 234 | 11.8 | 92.2  | 1.42 |
| D1         | CCHF11 | 6.04 | 8.59  | 13.7 | 5.98  | 69.6 | 42.1 | 2.02 | 23.5 | 69.7 | 0.58 | 6.8  | 22.7 | 0    | 0    | 32.5 | 0.01 | 0.1 | 35.6 | 15.1 | 219 | 9.6  | 84.6  | 1.4  |
| D3         | CCHF11 | 6.03 | 8.59  | 13.7 | 5.98  | 69.6 | 42.1 | 2.02 | 23.5 | 69.7 | 0.58 | 6.8  | 22.7 | 0    | 0    | 32.5 | 0.01 | 0.2 | 36.5 | 15.4 | 232 | 10.4 | 53.7  | 0.89 |
| D5         | CCHF11 | 6.01 | 3.95  | 13.6 | 1.45  | 36.7 | 41.5 | 2.44 | 69.7 | 0.37 | 8.4  | 22.6 | 0.02 | 0.5  | 32.5 | 0    | 0    | 35  | 14.8 | 243  | 9.9 | 84.3 | 0.57  |      |
| D7         | CCHF11 | 5.68 | 4.88  | 12.8 | 1.2   | 24.6 | 39.2 | 3.28 | 67.2 | 69   | 0.37 | 7.6  | 22.5 | 0.03 | 0.6  | 32.7 | 0    | 0   | 34.7 | 14.8 | 196 | 10.4 | 60.8  | 1.07 |
| D7 (rerun) | CCHF11 | 5.67 | 4.94  | 12.8 | 1.1   | 22.3 | 38.7 | 2.83 | 57.3 | 68.3 | 1    | 20.2 | 22.6 | 0.01 | 0.2  | 33.1 | 0    | 0   | 34.4 | 14.8 | 204 | 10.2 | 61.2  | 1.08 |
| D-70       | CCHF12 | 5.65 | 7.01  | 13.1 | 2.02  | 28.8 | 37.6 | 4.49 | 64.1 | 66.5 | 0.5  | 7.1  | 23.2 | 0    | 0    | 34.8 | 0    | 0   | 30.8 | 13.8 | 450 | 10.2 | 29.9  | 0.53 |
| D-63       | CCHF12 | 5.41 | 8.48  | 12.9 | 3.35  | 39.5 | 36.3 | 4.5  | 53.1 | 67.1 | 0.62 | 7.3  | 23.8 | 0    | 0    | 35.5 | 0.01 | 0.1 | 30.6 | 13.6 | 529 | 10.3 | 70.9  | 1.31 |
| D-56       | CCHF12 | 5.84 | 6.09  | 13.6 | 2.3   | 37.8 | 39.8 | 3.48 | 57.1 | 68.2 | 0.3  | 4.9  | 23.3 | 0.01 | 0.2  | 34.2 | 0    | 0   | 32.5 | 14.1 | 354 | 10.5 | 66.6  | 1.14 |
| D-49       | CCHF12 | 5.5  | 7.03  | 12.9 | 2.74  | 39   | 38.2 | 3.98 | 56.6 | 69.5 | 0.31 | 4.4  | 23.5 | 0    | 0    | 33.8 | 0    | 0   | 33.3 | 14   | 485 | 10.5 | 60    | 1.09 |
| D-42       | CCHF12 | 5.69 | 7.34  | 13.3 | 2.37  | 32.3 | 38.8 | 4.37 | 59.5 | 68.2 | 0.6  | 8.2  | 23.4 | 0    | 0    | 34.3 | 0    | 0   | 33.2 | 14.3 | 493 | 10.4 | 47.8  | 0.84 |
| D-35       | CCHF12 | 5.49 | 6.38  | 12.8 | 1.74  | 27.2 | 38.1 | 4.01 | 62.9 | 69.4 | 0.63 | 9.9  | 23.3 | 0    | 0    | 33.6 | 0    | 0   | 33.5 | 14.2 | 469 | 10.1 | 54.9  | 1    |
| D-28       | CCHF12 | 5.78 | 5.43  | 13.7 | 2.24  | 41.3 | 39.8 | 2.82 | 51.9 | 68.9 | 0.37 | 6.8  | 23.7 | 0    | 0    | 34.4 | 0    | 0   | 33   | 14.1 | 448 | 10.3 | 47.4  | 0.82 |
| D-21       | CCHF12 | 5.44 | 5.64  | 12.5 | 1.46  | 25.9 | 37.3 | 3.89 | 69   | 68.6 | 0.29 | 5.1  | 23   | 0    | 0    | 33.5 | 0    | 0   | 32.7 | 14   | 479 | 11.7 | 78.3  | 1.44 |
| D-14       | CCHF12 | 5.97 | 5.78  | 14.3 | 1.78  | 30.8 | 40.7 | 3.49 | 60.4 | 68.2 | 0.51 | 8.8  | 24   | 0    | 0    | 35.1 | 0    | 0   | 33.2 | 14.2 | 393 | 10.4 | 25.7  | 0.43 |
| D-7        | CCHF12 | 5.48 | 6.48  | 13.2 | 2.14  | 33   | 39   | 3.63 | 56   | 71.2 | 0.7  | 10.8 | 24   | 0.01 | 0.2  | 33.8 | 0    | 0   | 34.6 | 14.2 | 470 | 10.6 | 53.2  | 0.97 |
| D0         | CCHF12 | 5.75 | 5.77  | 14   | 1.88  | 32.6 | 40.2 | 3.11 | 53.9 | 69.9 | 0.78 | 13.5 | 24.3 | 0    | 0    | 34.8 | 0    | 0   | 33.1 | 13.9 | 386 | 10   | 45.4  | 0.79 |
| D1         | CCHF12 | 5.28 | 7.93  | 12.8 | 5.63  | 71   | 36.9 | 1.6  | 20.2 | 69.9 | 0.7  | 8.8  | 24.2 | 0    | 0    | 34.7 | 0    | 0   | 32.8 | 13.8 | 368 | 10   | 53.9  | 1.02 |
| D3         | CCHF12 | 5.44 | 4.19  | 13.3 | 1.4   | 33.5 | 37.8 | 2.59 | 61.8 | 69.5 | 0.19 | 4.5  | 24.4 | 0.01 | 0.2  | 35.2 | 0    | 0   | 32.3 | 13.5 | 375 | 10.1 | 23.9  | 0.44 |
| D5         | CCHF12 | 5.45 | 3.41  | 13.1 | 0.95  | 27.9 | 37.6 | 1.92 | 56.3 | 69   | 0.54 | 15.8 | 24   | 0    | 0    | 34.8 | 0    | 0   | 31.4 | 13.3 | 391 | 9.8  | 20.7  | 0.38 |
| D7         | CCHF12 | 4.72 | 3.03  | 11.4 | 0.94  | 31   | 32.6 | 1.85 | 61.1 | 69.1 | 0.24 | 7.9  | 24.2 | 0    | 0    | 35   | 0    | 0   | 31.2 | 13.3 | 348 | 9.3  | 36.3  | 0.77 |
| D-70       | CCHF13 | 6.55 | 9.19  | 14.9 | 6.02  | 65.5 | 46.1 | 2.37 | 25.8 | 70.4 | 0.8  | 8.7  | 22.7 | 0    | 0    | 32.3 | 0    | 0   | 35.2 | 15.1 | 379 | 10.4 | 27.5  | 0.42 |
| D-63       | CCHF13 | 6.07 | 13.45 | 14.9 | 6.08  | 71   | 43.4 | 1.92 | 22.7 | 71.5 | 0.45 | 5.3  | 22.9 | 0    | 0    | 32   | 0    | 0   | 35.8 | 14.7 | 372 | 9.8  | 98.8  | 1.71 |
| D-56       | CCHF13 | 6.09 | 14.3  | 14.3 | 6.09  | 50.3 | 45   | 2.7  | 44.7 | 71.8 | 0.33 | 5.4  | 23.3 | 0    | 0    | 31.8 | 0    | 0   | 37.3 | 15.7 | 440 | 10.8 | 51.3  | 1.3  |
| D-49       | CCHF13 | 6.12 | 6.17  | 14.1 | 3.14  | 50.9 | 44.2 | 2.6  | 42.1 | 72.2 | 0.43 | 7    | 23   | 0    | 0    | 31.9 | 0    | 0   | 38.3 | 16.2 | 472 | 10.9 | 68.5  | 1.12 |
| D-42       | CCHF13 | 6.38 | 5.86  | 14.6 | 2.51  | 42.7 | 45.5 | 2.81 | 48   | 71.3 | 0.52 | 8.9  | 22.9 | 0.01 | 0.2  | 32.1 | 0.01 | 0.2 | 37.5 | 16.2 | 405 | 10.7 | 51.7  | 0.81 |
| D-35       | CCHF13 | 6.24 | 6.68  | 14.3 | 2.42  | 36.2 | 45   | 3.6  | 53.9 | 72.1 | 0.66 | 9.9  | 22.9 | 0    | 0    | 31.8 | 0    | 0   | 38   | 16.1 | 399 | 10.3 | 66.8  | 1.07 |
| D-28       | CCHF13 | 6.36 | 7.11  | 14.6 | 3.58  | 50.4 | 45.4 | 2.92 | 41.1 | 71.4 | 0.6  | 8.4  | 23   | 0.01 | 0.1  | 32.2 | 0    | 0   | 37.5 | 15.8 | 455 | 10.8 | 57.2  | 0.9  |
| D-21       | CCHF13 | 6.05 | 6.02  | 14   | 2.26  | 37.6 | 43.7 | 3.39 | 56.3 | 72.2 | 0.37 | 6.1  | 23.1 | 0    | 0    | 32   | 0    | 0   | 36.7 | 14.9 | 449 | 10.7 | 98.6  | 1.63 |
| D-14       | CCHF13 | 6.35 | 12.07 | 14.9 | 8.33  | 69   | 45.4 | 2.86 | 23.7 | 71.5 | 0.86 | 7.1  | 23.5 | 0    | 0    | 32.8 | 0.02 | 0.2 | 36.8 | 15.5 | 435 | 10.8 | 72.4  | 1.14 |
| D-7        | CCHF13 | 6.11 | 7.44  | 14.3 | 4.44  | 59.6 | 44.7 | 2.37 | 31.9 | 73.2 | 0.63 | 8.5  | 23.4 | 0    | 0    | 32   | 0    | 0   | 37.5 | 14.9 | 420 | 10.5 | 113   | 1.85 |
| D0         | CCHF13 | 6.09 | 5.41  | 14.4 | 2.44  | 45.1 | 44.1 | 2.57 | 47.5 | 72.4 | 0.4  | 7.4  | 23.6 | 0    | 0    | 32.7 | 0    | 0   | 36.5 | 14.8 | 384 | 10.1 | 75.5  | 1.24 |
| D1         | CCHF13 | 5.78 | 12.68 | 13.7 | 9.98  | 78.7 | 42.4 | 2.07 | 16.3 | 73.4 | 0.63 | 5    | 23.7 | 0    | 0    | 32.3 | 0    | 0   | 36.8 | 14.7 | 372 | 9.8  | 98.8  | 1.71 |
| D3         | CCHF13 | 5.47 | 4.71  | 13   | 1.68  | 35.7 | 39.7 | 2.52 | 53.5 | 72.6 | 0.5  | 10.6 | 23.8 | 0.01 | 0.2  | 32.7 | 0    | 0   | 36.9 | 14.8 | 317 | 10.1 | 38.8  | 0.71 |
| D5         | CCHF13 | 5.47 | 2.74  | 13   | 0.97  | 35.4 | 39.8 | 1.42 | 51.8 | 72.8 | 0.35 | 12.8 | 23.8 | 0    | 0    | 32.7 | 0    | 0   | 35.8 | 14.4 | 268 | 10.4 | 12    | 0.22 |
| D7         | CCHF13 | 5.32 | 4.87  | 12.4 | 0.75  | 15.4 | 38.1 | 2.94 | 60.4 | 71.6 | 1.18 | 24.2 | 23.3 | 0    | 0    | 32.5 | 0    | 0   | 35.4 | 14.2 | 233 | 10.3 | 38.8  | 0.73 |
| D-70       | CCHF14 | 6    | 23.2  | 14.4 | 20.35 | 87.7 | 42.8 | 1.62 | 7    | 71.3 | 1.22 | 5.3  | 24   | 0.01 | 0    | 33.6 | 0    | 0   | 34.9 | 14.6 | 395 | 10.2 | 71.4  | 1.19 |
| D-63       | CCHF14 | 5.76 | 13.52 | 13.6 | 11.22 | 83   | 41.5 | 1.52 | 11.2 | 72   | 0.77 | 5.7  | 23.6 | 0.01 | 0.1  | 32.8 | 0    | 0   | 35.4 | 14.3 | 402 | 11.5 | 98.5  | 1.71 |
| D-56       | CCHF14 | 6.03 | 6.48  | 14.3 | 4.24  | 65.4 | 43.4 | 1.74 | 26.9 | 72   | 0.46 | 7.1  | 23.7 | 0.04 | 0.6  | 32.9 | 0    | 0   | 35.7 | 14.9 | 353 | 10.7 | 81.4  | 1.35 |
| D-49       | CCHF14 | 5.8  | 14.15 | 14   | 11.48 | 81.1 | 42.6 | 1.67 | 11.8 | 73.4 | 0.96 | 6.8  | 24.1 | 0.04 | 0.3  | 32.9 | 0    | 0   | 35.6 | 14.3 | 481 | 10.4 | 75.4  | 1.3  |
| D-42       | CCHF14 | 5.89 | 7.54  | 14.1 | 5.33  | 70.7 | 42.5 | 1.7  | 22.5 | 72.2 | 0.48 | 6.4  | 23.9 | 0.03 | 0.4  | 33.2 | 0    | 0   | 35.3 | 14.7 | 406 | 10.2 | 99.5  | 1.69 |
| D-35       | CCHF14 | 6.02 | 7.66  | 14.7 | 5.08  | 65.5 | 43.8 | 2.08 | 26.8 | 72.8 | 0.52 | 6.7  | 24.4 | 0.06 | 0.1  | 33.6 | 0    | 0   | 35.7 | 14.6 | 431 | 9.8  | 74    | 1.23 |
| D-28       | CCHF14 | 6.22 | 6.58  | 14.9 | 4.24  | 64.4 | 44.4 | 1.65 | 25.1 | 71.4 | 0.63 | 9.6  | 24   | 0.06 | 0.9  | 33.6 | 0    | 0   | 34.7 | 14.7 | 413 | 10   | 84    | 1.35 |
| D-21       | CCHF14 | 5.89 | 7.75  | 14.1 | 4.95  | 63.8 | 43   | 2.06 | 26.6 | 73   | 0.65 | 8.4  | 23.9 | 0.09 | 1.2  | 33.8 | 0    | 0   | 35.2 | 14.2 | 472 | 10.5 | 118.4 | 2.01 |
| D-14       | CCHF14 | 6.04 | 11.76 | 14.7 | 9.05  | 76.9 | 43.2 | 1.67 | 14.2 | 71.5 | 0.83 | 7.1  | 24.3 | 0.19 | 1.6  | 34   | 0.02 | 0.2 | 34.6 | 14.2 | 353 | 10.1 | 71.3  | 1.18 |
| D-7        | CCHF14 | 6.11 | 15.68 | 14.9 | 12.44 | 79.4 | 44.6 | 1.73 | 11   | 73   | 1.43 | 9.1  | 24.4 | 0.08 | 0.5  | 33.4 | 0    | 0   | 35.7 | 14.3 | 461 | 10   | 118.5 | 1.94 |
| D0         | CCHF14 | 6.32 | 13.05 | 15.3 | 10.94 | 83.8 | 45.2 | 1.24 | 9.5  | 71.5 | 0.85 | 6.5  | 24.2 | 0.02 | 0.2  | 33.8 | 0    | 0   | 34.6 | 14.1 | 404 | 9.9  | 77.7  | 1.23 |
| D1         | CCHF14 | 5.62 | 12.36 | 13.7 | 10.88 | 88.1 | 40.7 | 0.76 | 6.1  | 72.4 | 0.71 | 5.7  | 24.4 | 0.01 | 0.1  | 33.7 | 0    | 0   | 35.3 | 14.1 | 356 | 9.6  | 75.9  | 1.35 |
| D3         | CCHF14 | 5.58 | 5.61  | 13.6 | 3.36  | 59.9 | 40.4 | 1.68 | 29.9 | 72.4 | 0.48 | 8.6  | 24.4 | 0.09 | 1.6  | 33.7 | 0    | 0   | 35.3 | 14   | 268 | 10.2 | 45.2  | 0.81 |
| D5         | CCHF14 | 5.48 | 3.01  | 13.4 | 1.57  | 52.2 | 39.4 | 0.91 | 30.2 | 71.9 | 0.51 | 16.9 | 24.5 | 0.02 | 0.7  | 34   | 0    | 0   | 34   | 13.8 | 257 | 10   | 13.2  | 0.24 |
| D7         | CCHF14 | 5.2  | 5.53  | 12.4 | 2.3   | 41.6 | 37   | 2.17 | 39.2 | 71.2 | 1.05 | 19   | 23.8 | 0.01 | 0.2  | 33.5 | 0    | 0   | 33.6 | 13.7 | 250 | 10.7 | 26.5  | 0.51 |
| D-70       | CCHF15 | 6.08 | 10.23 | 13.7 | 7.16  | 69.9 | 41.4 | 2.42 | 23.7 | 68.1 | 0.65 | 6.4  | 22.5 | 0    | 0    | 33.1 | 0    | 0   | 35.4 | 15.4 | 393 | 9.6  | 65.7  | 1.08 |
| D-63       | CCHF15 | 6.03 | 7.68  | 13.5 | 4.99  | 65   | 42   | 2.24 | 29.2 | 69.7 | 0.43 | 5.6  | 22.4 | 0.01 | 0.1  | 32.1 | 0.01 | 0.1 | 36.7 | 15.8 | 396 | 10.5 | 323   | 2.04 |
| D-56       | CCHF15 | 5.97 | 6.13  | 13.5 | 2.93  | 47.8 | 41.2 | 2.7  | 45.6 | 69   | 0.44 | 7.2  | 22.6 | 0    | 0    | 32.8 | 0    | 0   | 35.7 | 15.4 | 342 | 10.3 | 85.4  | 1.43 |
| D-49       | CCHF15 | 6.02 | 10.36 | 13.7 | 6.59  | 63.6 | 42.3 | 3.15 | 30.4 | 70.3 | 0.62 | 6    | 22.8 | 0    | 0    | 32.4 | 0    | 0   | 36.5 | 15.6 | 430 |      |       |      |

|              |        |      |       |      |       |      |      |      |      |      |      |      |      |      |     |      |      |     |      |      |     |      |      |      |
|--------------|--------|------|-------|------|-------|------|------|------|------|------|------|------|------|------|-----|------|------|-----|------|------|-----|------|------|------|
| D1           | CCHF19 | 5.11 | 12.13 | 11.6 | 10.54 | 86.9 | 34.7 | 0.97 | 8    | 67.9 | 0.6  | 4.9  | 22.7 | 0.02 | 0.2 | 33.4 | 0    | 0   | 35.9 | 15.5 | 305 | 9.9  | 44.5 | 0.87 |
| D3           | CCHF19 | 4.97 | 3.49  | 11.4 | 1.95  | 55.9 | 33.2 | 1.32 | 37.8 | 66.8 | 0.18 | 5.2  | 22.9 | 0.04 | 1.1 | 34.3 | 0    | 0   | 35.5 | 15.3 | 255 | 10.2 | 30.3 | 0.61 |
| D5           | CCHF19 | 4.87 | 5.2   | 11.1 | 1.44  | 27.7 | 32.4 | 2.58 | 49.6 | 66.5 | 1.14 | 21.9 | 22.8 | 0.03 | 0.6 | 34.3 | 0.01 | 0.2 | 34.6 | 15   | 242 | 10.2 | 14.6 | 0.3  |
| D7           | CCHF19 | 4.86 | 12.52 | 11   | 3.55  | 28.4 | 32.4 | 7.98 | 63.7 | 66.7 | 0.97 | 7.7  | 22.6 | 0.01 | 0.1 | 34   | 0.01 | 0.1 | 35.3 | 15.3 | 263 | 10.5 | 53   | 1.09 |
| D-70         | CCHF20 | 5.74 | 6.77  | 12.8 | 4.74  | 70   | 38.8 | 1.78 | 26.3 | 67.6 | 0.25 | 3.7  | 22.3 | 0    | 0   | 33   | 0    | 0   | 34   | 14.8 | 291 | 12.1 | 48.8 | 0.85 |
| D-63         | CCHF20 | 5.41 | 7.34  | 11.9 | 4.77  | 65   | 37.4 | 2.14 | 29.2 | 69.1 | 0.39 | 5.3  | 22   | 0.04 | 0.5 | 31.8 | 0    | 0   | 34.5 | 14.5 | 298 | 12.8 | 54.1 | 1    |
| D-56         | CCHF20 | 5.5  | 7.65  | 12.3 | 5.21  | 68.1 | 37.6 | 2.03 | 26.5 | 68.4 | 0.38 | 5    | 22.4 | 0.03 | 0.4 | 32.7 | 0    | 0   | 33.9 | 14.5 | 263 | 12.2 | 55.6 | 1.01 |
| D-49         | CCHF20 | 5.42 | 7.14  | 12.1 | 5.01  | 70.2 | 37.7 | 1.75 | 24.5 | 69.6 | 0.35 | 4.9  | 22.3 | 0.02 | 0.3 | 32.1 | 0.01 | 0.1 | 35.2 | 14.9 | 288 | 12.1 | 75.3 | 1.39 |
| D-42         | CCHF20 | 5.62 | 6.38  | 12.6 | 4.35  | 68.2 | 39   | 1.61 | 25.2 | 69.4 | 0.4  | 6.3  | 22.4 | 0.02 | 0.3 | 32.3 | 0    | 0   | 34.7 | 14.7 | 295 | 12.3 | 85.4 | 1.52 |
| D-35         | CCHF20 | 5.49 | 3.94  | 12.2 | 2.03  | 51.5 | 38.9 | 1.56 | 39.6 | 70.9 | 0.35 | 8.9  | 22.2 | 0    | 0   | 31.4 | 0    | 0   | 36.1 | 14.7 | 306 | 11.6 | 59.8 | 1.09 |
| D-28         | CCHF20 | 5.66 | 6.23  | 12.8 | 4.6   | 73.8 | 39.6 | 1.35 | 21.7 | 70   | 0.27 | 4.3  | 22.6 | 0.01 | 0.2 | 32.3 | 0    | 0   | 34.7 | 14.7 | 287 | 12.4 | 53.2 | 0.94 |
| D-21         | CCHF20 | 5.48 | 5.12  | 12.3 | 2.82  | 55.1 | 38.8 | 1.9  | 37.1 | 70.8 | 0.37 | 7.2  | 22.4 | 0.03 | 0.6 | 31.7 | 0    | 0   | 35.3 | 14.4 | 163 | 14.9 | 72.9 | 1.33 |
| D-21 (rerun) | CCHF20 | 5.5  | 5.22  | 12.3 | 2.9   | 55.6 | 39   | 1.85 | 35.4 | 70.9 | 0.46 | 8.8  | 22.4 | 0.01 | 0.2 | 31.5 | 0    | 0   | 35.1 | 14.4 | 188 | 14.8 | 74.3 | 1.35 |
| D-14         | CCHF20 | 5.7  | 7.4   | 13.1 | 5.46  | 73.8 | 39.6 | 1.48 | 20   | 69.5 | 0.36 | 4.9  | 23   | 0.09 | 1.2 | 33.1 | 0.01 | 0.1 | 34   | 14.3 | 196 | 13   | 62.7 | 1.1  |
| D-14 (rerun) | CCHF20 | 5.7  | 6.83  | 13.1 | 5.07  | 74.2 | 39.8 | 1.35 | 19.8 | 69.8 | 0.32 | 4.7  | 23   | 0.08 | 1.2 | 32.9 | 0.01 | 0.1 | 34.2 | 14.3 | 174 | 12.2 | 63.3 | 1.11 |
| D-7          | CCHF20 | 5.43 | 6.02  | 12.6 | 4.28  | 71.1 | 38.9 | 1.28 | 21.3 | 71.6 | 0.44 | 7.3  | 23.2 | 0.02 | 0.3 | 32.4 | 0    | 0   | 35.5 | 14.3 | 302 | 12.4 | 76.6 | 1.41 |
| D0           | CCHF20 | 5.64 | 5.64  | 12.9 | 4.12  | 73   | 40.3 | 1.21 | 21.5 | 71.5 | 0.29 | 5.1  | 22.9 | 0.02 | 0.4 | 32   | 0    | 0   | 34.4 | 14   | 248 | 11.8 | —    | 0.21 |
| D0 (rerun)   | CCHF20 | 5.74 | 5.85  | 13.3 | 4.3   | 73.5 | 40   | 1.15 | 19.7 | 69.7 | 0.38 | 6.5  | 23.2 | 0.02 | 0.3 | 33.3 | 0    | 0   | 33.5 | 14.2 | 253 | 11.9 | 26.4 | 0.46 |
| D1           | CCHF20 | 5.01 | 8.6   | 11.7 | 7.15  | 83.2 | 35.8 | 1    | 11.6 | 71.5 | 0.45 | 5.2  | 23.4 | 0    | 0   | 32.7 | 0    | 0   | 34.3 | 14   | 251 | 11.1 | 47.6 | 0.95 |
| D3           | CCHF20 | 5.67 | 4.53  | 13.1 | 2.81  | 62   | 40.2 | 1.56 | 34.4 | 70.9 | 0.13 | 2.9  | 23.1 | 0.03 | 0.7 | 32.6 | 0    | 0   | 34.5 | 14.1 | 245 | 11.7 | 56.7 | 1    |
| D5           | CCHF20 | 5.15 | 1.34  | 12.1 | 0.45  | 33.6 | 36.1 | 0.65 | 48.5 | 70.1 | 0.23 | 17.2 | 23.5 | 0.01 | 0.7 | 33.5 | 0    | 0   | 33.3 | 14   | 169 | 11.2 | 37.1 | 0.72 |
| D5 (rerun)   | CCHF20 | 5.21 | 1.36  | 12   | 0.44  | 32.4 | 36.6 | 0.56 | 41.2 | 70.2 | 0.35 | 25.7 | 23   | 0.01 | 0.7 | 32.8 | 0    | 0   | 33.4 | 13.9 | 177 | 12.2 | 36.5 | 0.7  |
| D7           | CCHF20 | 5.37 | 2.91  | 12.3 | 0.79  | 27.1 | 36.9 | 1.81 | 62.2 | 68.7 | 0.31 | 10.7 | 22.9 | 0    | 0   | 33.3 | 0    | 0   | 32.5 | 13.7 | 78  | 12.6 | 6.4  | 0.12 |
| D7 (rerun)   | CCHF20 | 5.46 | 3.05  | 12.6 | 0.81  | 26.6 | 37.1 | 1.93 | 63.3 | 67.9 | 0.3  | 9.8  | 23.1 | 0.01 | 0.3 | 34   | 0    | 0   | 32.1 | 13.8 | 73  | 16   | 5.5  | 0.1  |
| D7 (rerun)   | CCHF20 | 5.4  | 2.98  | 12.7 | 0.78  | 26.1 | 36.3 | 1.93 | 64.8 | 67.2 | 0.27 | 9.1  | 23.5 | 0    | 0   | 35   | 0    | 0   | 31.5 | 13.7 | 75  | 15.8 | 10.3 | 0.19 |



**Supplemental Table 3: Complete Histological Findings for Study 2**

|                                                        | CCHF09 | CCHF10 | CCHF11 | CCHF12 | CCHF13 | CCHF14 | CCHF15         | CCHF16 | CCHF17 | CCHF18 | CCHF19 | CCHF20 |
|--------------------------------------------------------|--------|--------|--------|--------|--------|--------|----------------|--------|--------|--------|--------|--------|
|                                                        | Sham   |        |        |        |        |        | repNP + repGPC |        |        |        |        |        |
| Skin: Inj site                                         |        |        |        |        |        |        |                |        |        |        |        |        |
| lymphohistiocytic dermatitis                           | 0      | 1      | 0      | 1      | 0      | 0      | 0              | 0      | 0      | 0      | 0      | 0      |
| ALN                                                    | 0      | 0      | np     | 0      | np     | 0      | 0              | 0      | 0      | 0      | 0      | 0      |
| ILN                                                    | 0      | 0      | 0      | 0      | 0      | 0      | 0              | 0      | 0      | 0      | 0      | 0      |
| Salivary gland                                         |        |        |        |        |        |        |                |        |        |        |        |        |
| lymphoplasmacytic infiltrates                          | 0      | 1      | 0      | 1      | 1      | 1      | 0              | 2      | 0      | 0      | 0      | 0      |
| RLL                                                    |        |        |        |        |        |        |                |        |        |        |        |        |
| lymphocytic perivascular cuffing                       | 0      | 0      | 0      | 0      | 0      | 0      | 0              | 0      | 2      | 0      | 0      | 0      |
| Heart                                                  |        |        |        |        |        |        |                |        |        |        |        |        |
| lymphohistiocytic infiltrates                          | 0      | 1      | 1      | 1      | 0      | 2      | 2              | 0      | 0      | 0      | 0      | 0      |
| Liver                                                  |        |        |        |        |        |        |                |        |        |        |        |        |
| Hepatocellular necrosis                                | 1      | 1      | 2      | 1      | 1      | 1      | 0              | 0      | 0      | 0      | 0      | 0      |
| Portal inflammation                                    | 0      | 1      | 1      | 1      | 1      | 1      | 1              | 1      | 1      | 0      | 0      | 0      |
| Lymphohistiocytic nodules                              | 1      | 0      | 3      | 2      | 3      | 3      | 1              | 0      | 1      | 0      | 1      | 1      |
| Ito cell hyperplasia                                   | 2      | 0      | 2      | 0      | 2      | 2      | 2              | 0      | 0      | 0      | 3      | 3      |
| microthrombi                                           | 0      | 0      | 0      | 0      | 0      | 0      | 0              | 0      | 1      | 0      | 0      | 0      |
| Spleen                                                 |        |        |        |        |        |        |                |        |        |        |        |        |
| Lymphoid depletion                                     | 0      | 0      | 0      | 0      | 0      | 0      | 0              | 0      | 0      | 0      | 0      | 0      |
| Lymphoid hyperplasia                                   | 0      | 0      | 0      | 0      | 0      | 0      | 0              | 0      | 0      | 0      | 0      | 0      |
| Parafollicular fibrin                                  | 0      | 0      | 0      | 0      | 0      | 0      | 0              | 0      | 0      | 0      | 0      | 0      |
| Kidney                                                 |        |        |        |        |        |        |                |        |        |        |        |        |
| Tubular epithelial degeneration/necrosis and sloughing | 0      | 0      | 0      | 0      | 0      | 0      | 0              | 0      | 0      | 0      | 0      | 0      |
| Neutrophilic interstitial nephritis                    | 0      | 0      | 0      | 0      | 0      | 0      | 0              | 0      | 0      | 0      | 0      | 0      |
| Lymphocytic interstitial nephritis                     | 0      | 0      | 0      | 0      | 0      | 0      | 1              | 0      | 0      | 0      | 0      | 0      |
| Adrenal gland                                          |        |        |        |        |        |        |                |        |        |        |        |        |
|                                                        | 0      | 0      | 0      | 0      | 0      | 0      | 0              | 0      | 0      | 0      | 0      | 0      |
| Pancreas                                               |        |        |        |        |        |        |                |        |        |        |        |        |
|                                                        | 0      | 0      | 0      | 0      | 0      | 0      | 0              | 0      | 0      | 0      | 0      | 0      |
| Mes LN                                                 |        |        |        |        |        |        |                |        |        |        |        |        |
| granuloma                                              | np     | 0      | 0      | 1      | 0      | 0      | 0              | 1      | 0      | 0      | 0      | 0      |
| hemosiderin-laden macrophages                          | 0      | 0      | 0      | 0      | 0      | 0      | 0              | 0      | 1      | 0      | 2      | 1      |
| Stomach                                                |        |        |        |        |        |        |                |        |        |        |        |        |
| lymphoplasmacytic infiltrate                           | 3      | 2      | 3      | 0      | 3      | 3      | 0              | 3      | 0      | 1      | 0      | 0      |
| Duodenum                                               |        |        |        |        |        |        |                |        |        |        |        |        |
| lymphoplasmacytic infiltrate                           | 2      | 2      | 0      | 0      | 2      | 2      | 3              | 2      | 2      | 2      | 0      | 1      |
| Jejunum                                                |        |        |        |        |        |        |                |        |        |        |        |        |
| ascaris granuloma                                      | 0      | 0      | 0      | 1      | 0      | 0      | 0              | 0      | 0      | 0      | 0      | 0      |
| Ileum                                                  |        |        |        |        |        |        |                |        |        |        |        |        |
| lymphoplasmacytic infiltrate                           | 2      | 0      | 0      | 0      | 0      | 0      | 0              | 0      | 0      | 0      | 0      | 0      |
| villi loss and atrophy                                 | 1      | 0      | 0      | 0      | 0      | 0      | 0              | 0      | 0      | 0      | 0      | 0      |
| Cecum                                                  |        |        |        |        |        |        |                |        |        |        |        |        |
| lymphoplasmacytic infiltrate                           | 0      | 1      | 0      | 0      | 0      | 0      | 0              | 1      | 1      | 1      | 1      | 1      |
| Colon                                                  |        |        |        |        |        |        |                |        |        |        |        |        |
| lymphoplasmacytic infiltrate                           | 0      | 0      | 0      | 0      | 0      | 0      | 0              | 0      | 1      | 0      | 0      | 0      |
| Urinary bladder                                        |        |        |        |        |        |        |                |        |        |        |        |        |
| subepithelial lymphocytic infiltrate                   | 0      | 0      | 0      | 0      | 0      | 0      | 0              | 0      | 2      | 0      | 0      | 0      |
| Repro                                                  |        |        |        |        |        |        |                |        |        |        |        |        |
| ovary                                                  | 0      | na     | 0      | na     | 0      | 0      | 0              | na     | 0      | na     | 0      | 0      |
| Testicel                                               | na     | 0      | na     | 0      | na     | na     | na             | 0      | na     | 0      | np     | np     |
| Bone marrow                                            |        |        |        |        |        |        |                |        |        |        |        |        |
| brown granular pigment                                 | 0      | np     | 0      | 0      | 0      | np     | 2              | np     | 0      | np     | 0      | 0      |
| CLN                                                    | 0      | 0      | 0      | 0      | 0      | 0      | 0              | 0      | np     | 0      | 0      | 0      |
| Misc                                                   |        |        |        |        |        |        |                |        |        |        |        |        |
|                                                        |        |        |        |        |        | *      |                |        |        |        | *      |        |

0 = No lesions  
 1 = Minimal (1-10%)  
 2 = Mild (11-25%)  
 3 = Moderate (26-50%)  
 4 = Marked (51-75%)  
 5 = Severe (76-100%)

0 = No lesions  
 1 = Minimal (1-10%)  
 2 = Mild (11-25%)  
 3 = Moderate (26-50%)  
 4 = Marked (51-75%)  
 5 = Severe (76-100%)

0 = No lesions  
 1 = Minimal (1-10%)  
 2 = Mild (11-25%)  
 3 = Moderate (26-50%)  
 4 = Marked (51-75%)  
 5 = Severe (76-100%)

na = not applicable  
 np = not present

### Supplemental Table 4: Complete IHC Findings for Study 2

|                                                  | CCHF09 | CCHF10 | CCHF11 | CCHF12 | CCHF13 | CCHF14 | CCHF15         | CCHF16 | CCHF17 | CCHF18 | CCHF19 | CCHF20 |
|--------------------------------------------------|--------|--------|--------|--------|--------|--------|----------------|--------|--------|--------|--------|--------|
|                                                  | Sham   |        |        |        |        |        | repNP + repGPC |        |        |        |        |        |
| Heart                                            | 0      | 0      | 0      | 0      | 0      | 0      | 0              | 0      | 0      | 0      | 0      | 0      |
| Liver                                            |        |        |        |        |        |        |                |        |        |        |        |        |
| kupffer cells, endothelial cells and hepatocytes | 4      | 2      | 3      | 3      | 3      | 3      | 0              | 0      | 0      | 0      | 0      | 4      |
| Spleen                                           |        |        |        |        |        |        |                |        |        |        |        |        |
| endothelial cells and macrophages                | 1      | 2      | 2      | 3      | 3      | 4      | 0              | 0      | 0      | 0      | 0      | 3      |
| Adrenal gland                                    |        |        |        |        |        |        |                |        |        |        |        |        |
| endothelial cells and macrophages                | 1      | 1      | 1      | 1      | 2      | 2      | 0              | 0      | 0      | 0      | 0      | 2      |

**IHC attachment**  
 0=none  
 1=rare/few  
 2=scattered  
 3=moderate  
 4=numerous  
 5=diffuse
